1 **The photoreceptor UVR8 mediates the perception of both UV-B and UV-A wavelengths up to**  
2 **350 nm of sunlight with responsivity moderated by cryptochromes**

3

4 Neha Rai<sup>1</sup>, Andrew O'Hara<sup>2</sup>, Daniel Farkas<sup>2</sup>, Omid Safronov<sup>1</sup>, Khuanpiroon Ratanasopa<sup>2</sup>, Fang  
5 Wang<sup>1</sup>, Anders V. Lindfors<sup>3</sup>, Gareth I. Jenkins<sup>4</sup>, Tarja Lehto<sup>5</sup>, Jarkko Salojärvi<sup>1,6</sup>, Mikael Brosché<sup>1</sup>,  
6 Åke Strid<sup>2</sup>, Pedro J. Aphalo<sup>1\*</sup>, Luis O. Morales<sup>1†\*</sup>

7

8 <sup>1</sup>Organismal and Evolutionary Biology, Faculty of Biological and Environmental Sciences, and  
9 Viikki Plant Science Centre, University of Helsinki, 00014 Helsinki, Finland;

10 <sup>2</sup>School of Science and Technology, Örebro Life Science Center, Örebro University, 70182 Örebro,  
11 Sweden;

12 <sup>3</sup>Finnish Meteorological Institute, Meteorological Research, 00101 Helsinki, Finland;

13 <sup>4</sup>Institute of Molecular, Cell and Systems Biology, College of Medical, Veterinary and Life  
14 Sciences, University of Glasgow, Glasgow G12 8QQ, United Kingdom;

15 <sup>5</sup>School of Forest Sciences, University of Eastern Finland, 80101 Joensuu, Finland;

16 <sup>6</sup>School of Biological Sciences, Nanyang Technological University, 637551 Singapore, Singapore

17

18 <sup>†</sup>Current address: School of Science and Technology, Örebro Life Science Center, Örebro  
19 University, 70182 Örebro, Sweden

20 \* These authors contributed equally as senior authors.

21

22 Author for correspondence:

23 *Luis O. Morales*

24 *Tel: +46739434429*

25 *Email: [luis.morales@oru.se](mailto:luis.morales@oru.se)*

26 *ORCID: [0000-0002-9233-7254](https://orcid.org/0000-0002-9233-7254)*

27

28 **Funding**

29

30 Funding by Academy of Finland (252548) to PJA, and (307335) to MB and JS; EDUFI Fellowship,  
31 Finnish Cultural Foundation and Doctoral Program in Plant Sciences funding (University of  
32 Helsinki) to NR; Knowledge foundation (20130164) and Swedish Research Council Formas (942-  
33 2015-516) to ÅS; Strategic Young Researchers Recruitment Programme (Örebro University) to  
34 LOM.

35

36 **Abstract**

37

38 The photoreceptors UV RESISTANCE LOCUS 8 (UVR8) and CRYPTOCHROMES 1 and 2  
39 (CRYs) play major roles in the perception of UV-B (280–315 nm) and UV-A/blue radiation (315–  
40 500 nm), respectively. However, it is poorly understood how they function in sunlight. The roles of  
41 UVR8 and CRYs were assessed in a factorial experiment with *Arabidopsis thaliana* wild-type and  
42 photoreceptor mutants exposed to sunlight for 6 h or 12 h under five types of filters with cut-offs in  
43 UV and blue-light regions. Transcriptome-wide responses triggered by UV-B and UV-A  
44 wavelengths shorter than 350 nm (UV-A<sub>sw</sub>) required UVR8 whereas those induced by blue and UV-  
45 A wavelengths longer than 350 nm (UV-A<sub>lw</sub>) required CRYs. UVR8 modulated gene expression in  
46 response to blue light while lack of CRYs drastically enhanced gene expression in response to UV-  
47 B and UV-A<sub>sw</sub>. These results agree with our estimates of photons absorbed by these photoreceptors  
48 in sunlight and with *in vitro* monomerization of UVR8 by wavelengths up to 335 nm. Motif  
49 enrichment analysis predicted complex signaling downstream of UVR8 and CRYs. Our results  
50 highlight that it is important to use UV waveband definitions specific to plants'  
51 photomorphogenesis as is routinely done in the visible region.

52

53 **Keywords**

54

55 *Arabidopsis thaliana*, blue light, cryptochrome, gene expression, photoreceptor interaction, solar  
56 radiation, ultraviolet radiation, UVR8.

57

58 **Acknowledgements**

59

60 We acknowledge Petri Auvinen (University of Helsinki) for RNA-sequencing.

61

62 **Conflict of Interest**

63

64 The authors declare no conflict of interests.

65 **Main text file**

66

67 **The photoreceptor UVR8 mediates the perception of both UV-B and UV-A wavelengths up to**  
68 **350 nm of sunlight with responsivity moderated by cryptochromes**

69

70 **Abstract**

71

72 The photoreceptors UV RESISTANCE LOCUS 8 (UVR8) and CRYPTOCHROMES 1 and 2  
73 (CRYs) play major roles in the perception of UV-B (280–315 nm) and UV-A/blue radiation (315–  
74 500 nm), respectively. However, it is poorly understood how they function in sunlight. The roles of  
75 UVR8 and CRYs were assessed in a factorial experiment with *Arabidopsis thaliana* wild-type and  
76 photoreceptor mutants exposed to sunlight for 6 h or 12 h under five types of filters with cut-offs in  
77 UV and blue-light regions. Transcriptome-wide responses triggered by UV-B and UV-A  
78 wavelengths shorter than 350 nm (UV-A<sub>sw</sub>) required UVR8 whereas those induced by blue and UV-  
79 A wavelengths longer than 350 nm (UV-A<sub>lw</sub>) required CRYs. UVR8 modulated gene expression in  
80 response to blue light while lack of CRYs drastically enhanced gene expression in response to UV-  
81 B and UV-A<sub>sw</sub>. These results agree with our estimates of photons absorbed by these photoreceptors  
82 in sunlight and with *in vitro* monomerization of UVR8 by wavelengths up to 335 nm. Motif  
83 enrichment analysis predicted complex signaling downstream of UVR8 and CRYs. Our results  
84 highlight that it is important to use UV waveband definitions specific to plants’  
85 photomorphogenesis as is routinely done in the visible region.

86

87 **Keywords**

88

89 *Arabidopsis thaliana*, blue light, cryptochrome, gene expression, photoreceptor interaction, solar  
90 radiation, ultraviolet radiation, UVR8.

91

92 **1 INTRODUCTION**

93

94 Sunlight regulates plant growth, development and acclimation to the environment, while responses  
95 to specific wavelengths are regulated by different photoreceptors. The contribution of different  
96 wavelengths of sunlight to plant responses depends both on the optical properties of the  
97 photoreceptors and on the spectrum and photon irradiance of the incident radiation. Research under  
98 controlled conditions has shown that the photoreceptors UV RESISTANCE LOCUS 8 (UVR8) and

99 CRYPTOCHROMES 1 and 2 (CRYs) play major roles in the perception of UV-B (ground level  
100 290–315 nm) and UV-A/blue radiation (315–500 nm), respectively (Ahmad & Cashmore, 1993;  
101 Lin, 2000; Yu *et al.*, 2010; Rizzini *et al.*, 2011). However, in sunlight, the irradiances of  
102 photosynthetically active radiation (PAR, 400–700 nm) and UV-A (315–400 nm) relative to UV-B  
103 are much higher than those normally used in controlled environments making it necessary to assess  
104 which wavelengths are effectively perceived by UVR8 and CRYs in sunlight.

105

106 Indoor and outdoor experiments with UV-B irradiances similar to those in sunlight have shown that  
107 UVR8 can regulate transcript abundance of hundreds of genes, including those involved in UV  
108 protection, photo-repair of UV-B-induced DNA damage, oxidative stress and several transcription  
109 factors (TFs) shared with other signaling pathways (Brown *et al.*, 2005; Favory *et al.*, 2009;  
110 Morales *et al.*, 2013). The first step in this response is the absorption of UV-B photons by UVR8  
111 which triggers a change in conformation from homodimer to monomer enhancing its accumulation  
112 in the nucleus (Brown *et al.*, 2005; Kaiserli & Jenkins, 2007; Rizzini *et al.*, 2011). Downstream  
113 signaling depends on UVR8 monomers binding to CONSTITUTIVE PHOTOMORPHOGENIC 1  
114 (COP1) (Favory *et al.*, 2009), thereby inactivating the E3 ubiquitin ligase activity of COP1. The  
115 UVR8-COP1 association stabilizes the TF ELONGATED HYPOCOTYL 5 (HY5), a master  
116 regulator of photomorphogenesis in plants (Favory *et al.*, 2009; Huang *et al.*, 2013; Gangappa &  
117 Botto, 2016). Both HY5 and HY5 HOMOLOG (HYH) have been identified as key TFs regulating  
118 the expression of most genes responding to UV-B through UVR8 signaling (Brown & Jenkins,  
119 2008; Favory *et al.*, 2009). Moreover, UVR8 directly interacts with WRKY DNA-BINDING  
120 PROTEIN 36 (WRKY36), BRI1-EMS-SUPPRESSOR1 (BES1) and BES1-INTERACTING MYC-  
121 LIKE 1 (BIM1) TFs to regulate transcription (Liang *et al.*, 2018; Yang *et al.*, 2018). UV-B radiation  
122 induces the expression of genes encoding REPRESSOR OF UV-B PHOTOMORPHOGENESIS 1  
123 (RUP1) and RUP2 proteins, which interact with UVR8 directly and convert the active monomers  
124 into homodimers, thereby decreasing the abundance of UVR8 monomers through negative feedback  
125 (Gruber *et al.*, 2010; Heijde & Ulm, 2013). Because indoor studies are often done using  
126 unrealistically high UV-B:PAR and low UV-A:PAR ratios, the participation of UVR8 in the  
127 regulation of the transcriptome in response to UV-B, UV-A and blue wavelengths of solar radiation  
128 remains uncertain.

129

130 Our understanding of the molecular mechanisms underpinning CRY-mediated responses to blue  
131 light is far better than for those to UV-A. In indoor experiments with blue light, CRYs have been  
132 found to regulate photomorphogenesis and expression of genes involved in light signaling,

133 photosynthetic light reaction, the Calvin cycle, phenylpropanoid metabolic pathway and stress  
134 response (Ohgishi *et al.*, 2004; Kleine *et al.*, 2007). Upon absorption of blue light photons, CRYs  
135 alter conformation from monomers to homodimers and oligomers (Wang *et al.*, 2016). CRYs  
136 homodimers or oligomers interact with COP1 and SUPPRESSOR OF PHY A (SPA) proteins  
137 through various mechanisms (Yang *et al.*, 2001; Wang *et al.*, 2001; Lian *et al.*, 2011; Liu *et al.*,  
138 2011b; Zuo *et al.*, 2011; Podolec & Ulm, 2018). These interactions stabilize HY5 abundance and  
139 consequent transcriptional regulation (Liu *et al.*, 2011a; Yang *et al.*, 2017; Podolec & Ulm, 2018).  
140 CRYs also interact directly with TFs such as BES1, BIM1, CRYPTOCHROME-INTERACTING  
141 basic helix-loop-helix 1 (CIB1), PHYTOCHROME-INTERACTING FACTOR 4 (PIF4) and PIF5  
142 regulating transcription (Liu *et al.*, 2008; Pedmale *et al.*, 2016; Wang *et al.*, 2018). Thus, both  
143 UVR8 and CRY signaling share some TFs such as HY5, HYH and BES1 suggesting the possibility  
144 of crosstalk. Despite these studies under controlled conditions, the participation of CRYs in the  
145 regulation of the transcriptome in sunlight remains poorly understood due to the unrealistic light  
146 conditions used.

147

148 As photoreceptors have broad peaks of absorption, their absorption spectra partially overlap. Both  
149 CRYs and UVR8 absorb in the UV-B region, while CRYs also absorb strongly at longer  
150 wavelengths (Banerjee *et al.*, 2007; Christie *et al.*, 2012; Yang *et al.*, 2015). Given the overlapping  
151 spectra of photoreceptors and the fact that plants are simultaneously exposed to all wavelengths of  
152 sunlight, only research in sunlight can assess the roles of photoreceptors in nature. The available  
153 absorption spectrum for the UVR8 molecule covers the UV-C and UV-B regions, extending only  
154 15 nm into the UV-A (Christie *et al.*, 2012) making even speculations about the possible role of  
155 UVR8 in the UV-A region uncertain. Furthermore, our previous studies indicated that different  
156 regions within UV-A could trigger different responses to metabolite accumulation and transcript  
157 abundance of selected genes (Siipola *et al.*, 2015; Rai *et al.*, 2019). Besides, results from an indoor  
158 experiment suggested the participation of UVR8 in flavonoid accumulation in response to UV-A  
159 from LEDs (Brelsford *et al.*, 2018). However, it is not yet clear which UV-A wavelengths are  
160 perceived through UVR8 and which ones through CRYs.

161

162 To assess the roles of UVR8 and CRYs in the perception of solar UV-B, UV-A and blue radiation,  
163 we measured transcriptome-wide responses in Arabidopsis plants exposed to sunlight. We also  
164 measured the *in vitro* absorption spectrum of UVR8 in the UV-C, UV-B, UV-A and visible regions  
165 (250–500 nm), the *in vitro* monomerization of UVR8 by different UV-A wavelengths, and  
166 estimated numbers of sunlight photons absorbed by UVR8 and CRYs. We tested four hypotheses:

167 1) the perception of solar UV-B and UV-A wavelengths up to 350 nm (UV-A<sub>sw</sub>) is through UVR8,  
168 2) the perception of solar UV-A wavelengths above 350 nm (UV-A<sub>lw</sub>) and blue light is through  
169 CRYs, 3) crosstalk between UV-B/UV-A<sub>sw</sub> and UV-A<sub>lw</sub>/blue light signaling is asymmetric in plants  
170 exposed to sunlight, and 4) gene expression responses to different wavelengths of sunlight are  
171 coordinated by multiple TFs resulting in multiple patterns of expression.

172

## 173 **2 MATERIALS AND METHODS**

174

### 175 **2.1 Plant material and treatments**

176

177 *Arabidopsis thaliana* ecotype Landsberg *erecta* (*Ler*) and the photoreceptor mutants *uvr8-2* (Brown  
178 *et al.*, 2005) and *cry1cry2* (Neff & Chory, 1998) were used. The *uvr8-2* genotype carries a mutation  
179 in the C-terminus of the UVR8 protein that impairs signaling in response to UV-B (Cloix *et al.*,  
180 2012). The *cry1cry2* genotype carries null mutations for CRY1 and CRY2 protein and consequently  
181 is impaired in blue light perception through CRYs (Mazzella *et al.*, 2001). Seeds from different  
182 genotypes used in the experiments were previously grown and harvested under the same growth  
183 conditions. Seeds were sown in plastic pots (8 cm × 8 cm) containing a 1:1 mixture of peat and  
184 vermiculite and kept in darkness at 4 °C for 3 d. Subsequently, the pots were transferred to  
185 controlled-environment growth room at 23 °C:19 °C and 70%:90% relative humidity (light:dark)  
186 under 12 h photoperiod with 280 μmol m<sup>-2</sup> s<sup>-1</sup> white light irradiance, 12 mol day<sup>-1</sup> (Osram T8 L  
187 36W/865 Lumilux). Rosco filter E-color 226 was used to block the small amount of UV-A radiation  
188 emitted by the lamps. Four seedlings of the same genotype were transplanted into each plastic pot  
189 (8 cm × 8 cm). After transplanting, plants were kept for 14 d in the same growth room and  
190 conditions.

191

192 For exposure to sunlight, plants were moved to the field (Viikki campus, University of Helsinki,  
193 60°13'N, 25°1'E) on 21 August 2014 between 07:30 and 08:15. Five treatments were created with  
194 different plastic sheets (3 mm thick) and a film (0.12 mm thick) used as long-pass optical filters to  
195 selectively exclude different wavebands of the UV and blue regions (Figure 1, Methods S1). The  
196 filters were kept 10–15 cm above the top of the plants, on their south and north edges, respectively.  
197 Their transmittance was measured with a spectrophotometer (model 8453, Agilent, Waldbronn,  
198 Germany, Figure 1). Treatments were randomly assigned within four blocks (biological replicates).  
199 One tray was kept under one filter and there was one filter of each type per block. Each tray

200 contained two pots per genotype, positioned at random within the trays, for sampling after 6 h and  
201 12 h.

202

## 203 **2.2 Light conditions and sampling outdoors**

204

205 Hourly solar spectra at ground level were modeled for the 12 h of exposure period using a radiation  
206 transfer model (libradtran, Emde *et al.*, 2016) and cloudiness estimates derived from global  
207 radiation measurements (Lindfors *et al.*, 2009). Figure S1 shows the solar spectrum at different  
208 times of the day when plants were moved outdoors. Figure S2 shows the hourly mean photon  
209 irradiance of UV-B (290–315 nm), UV-A<sub>sw</sub> (315–350 nm), UV-A long-wavelength (UV-A<sub>lw</sub> 350–  
210 400 nm), blue (400–500 nm) and PAR (400–700 nm), for the broader wavebands  $\lambda < 350$  nm (290–  
211 350 nm) and  $\lambda > 350$  nm (350–500 nm). The hourly solar spectra were convoluted by the spectral  
212 transmittance of each filter to estimate the spectrum the plants were exposed to. Then these spectra  
213 were convoluted by the *in vitro* spectral absorbance of UVR8 (see Results) or of light-adapted  
214 CRY2 (Banerjee *et al.*, 2007) to estimate the relative numbers of photons absorbed by UVR8 and  
215 CRY2 in each treatment. Plotting and calculations on the simulated spectra were done in R (R Core  
216 Team, 2018, Aphalo, 2015).

217

218 Samples were collected after 6 h and 12 h of exposure to sunlight (13:30–14:15, 19:30–20:20) by  
219 block with treatments and genotypes in random order within each block. Each biological sample  
220 consisted of leaves from four pooled rosettes from the same pot, which were immediately frozen in  
221 liquid nitrogen and later stored at  $-80$  °C. Each pooled sample was ground with mortar and pestle in  
222 liquid nitrogen.

223

## 224 **2.3 RNA sequencing**

225

226 Total RNA was extracted from ground leaf samples with a GeneJET Plant RNA Purification Kit  
227 following manufacturer's guidelines (Thermo Fisher Scientific, Vilnius, Lithuania). RNA quality  
228 was checked with Agilent 2100 Bioanalyzer (Santa Clara, CA, USA) and RNA concentration was  
229 measured with ND-1000 Spectrophotometer (NanoDrop Technologies, Thermo Fisher Scientific,  
230 Waltham, MA, USA). For RNA-seq measurements, RNA extracts from two pairs of biological  
231 replicates were combined into two pooled replicates. Libraries were constructed using TruSeq  
232 Stranded mRNA Sample PrepKit (Illumina, San Diego, CA, USA) following manufacturer's

233 instructions. The library concentration was measured using Qubit Fluorometer (Life Technologies,  
234 Carlsbad, CA, USA), and quality and size were checked by Fragment Analyzer (Agilent  
235 Technologies). Libraries were sequenced on NextSeq 500 (Illumina) generating single end 75 bp  
236 reads. RNA-seq raw data was deposited at Gene Expression Omnibus (accession number  
237 GSE117199).

238

239 RNA-seq data analysis was done using the JAVA-based client-server system, Chipster (Kallio *et al.*,  
240 *et al.*, 2011) and in R. The quality of raw reads was checked with FastQC (Andrews, 2014). Removal  
241 of adapter sequences, trimming and cropping of the reads were done using Trimmomatic-0.33  
242 (Bolger *et al.*, 2014) in single-end mode. The bases with a Phred score  $< 20$  were trimmed from the  
243 ends of the reads, and the reads shorter than 30 bases were removed from the analysis (-Phred33,  
244 TRAILING:20, MINLEN:30).

245

246 Filtered reads were mapped to the Arabidopsis transcript reference database AtRTD2 (Zhang *et al.*,  
247 2017) using Kallisto V-0.43.0 (CMD:quant) (Bray *et al.*, 2016) with 4000 bootstrap sets. The raw  
248 count tables for the two pooled replicates were obtained as the mean of the bootstrap runs. Genes  
249 with less than five counts in all 21 filter-treatment  $\times$  genotype combinations were removed. The  
250 count tables were analyzed for differential gene expression with edgeR 3.24.3 (Robinson *et al.*,  
251 2010). The glmLRT (McCarthy *et al.*, 2012) method was used to fit the statistical model separately  
252 to data from each genotype. Differentially expressed genes (DEGs) across treatments and  
253 photoreceptor mutants under selected pairwise contrasts were assessed with method  
254 decideTestsDGE using Benjamini-Hochberg FDR correction of  $P$ -values, with  $FDR \leq 0.05$ . In a  
255 separate step,  $|\log_2 FC| > \log_2(1.5)$  was used as threshold. Effects of wavebands were assessed by  
256 comparing responses between pairs of filters as described above (Figure 1).

257

258 Function plotMDS from package limma 3.38.3 (Ritchie *et al.*, 2015) was used to carry out  
259 dimensionality reduction to test for consistency between replicates. To compare RNA-seq and qRT-  
260 PCR estimates of transcript abundance, estimates from RNA-seq were re-expressed relative to *Ler*  
261 UV0 to match qRT-PCR data and major axis regression applied (R package lmodel2 1.7-3,  
262 Legendre, 2018).

263

264 Enrichment of Kyoto Encyclopedia of Genes and Genomes (KEGG) pathways was assessed using  
265 function topKEGG (edgeR 3.24.3) using pathway definitions downloaded from <http://rest.kegg.jp>  
266 on 10 April 2019. Pathways whose definition included at least 15 but not more than 250 genes were



267 included in the analysis. The enrichments were tested for all lists of DEGs from the contrast tests  
268 described above, and all the genes expressed in our experiment were used as background.  
269 Conditions used to assess significance of pathway enrichment were  $P$ -value cut-off of 0.01 and at  
270 least 1/3 of pathway genes differentially expressed. All pathways fulfilling both conditions in at  
271 least one treatment contrast are reported.

272

## 273 **2.4 Cis-motif enrichment**

274

275 Transcription factor binding motifs were collected in the form of position-specific weight matrices  
276 (PSWMs) from JASPAR 2018 (Khan *et al.*, 2018) and Cistrome (O'Malley *et al.*, 2016) databases.  
277 In addition to PSWMs we analyzed a previously collected set of binding motifs (Blomster *et al.*,  
278 2011). For each contrast within each genotype, the enrichment analyses were run on the lists of  
279 upregulated and downregulated genes from RNA-seq analysis. The promoter sequences 1000 base  
280 pairs upstream of transcription start sites of all Arabidopsis genes were scanned for binding motifs.  
281 The regular expressions were matched in R, and PSWM hits were identified using MEME  
282 (Ambrosini *et al.*, 2018) with default thresholds. The significance of the overlap between the gene  
283 lists and motif occurrences was then tested with Fisher exact test, followed by FDR correction using  
284 Benjamini-Hochberg correction. Based on the motifs enriched in each of the separate lists of up or  
285 downregulated genes for the 12 waveband  $\times$  genotype combinations, we identified putative TFs  
286 which could regulate the expression of those genes. Clustering was done over the obtained lists of  
287 TFs, based on the adjusted  $P$ -values for enrichment in each contrast and genotype combination. For  
288 visualization, the  $P$ -values were first restricted to the range of 1 to  $10^{-4}$  by converting all smaller  
289 values to  $10^{-4}$ , and subsequently applying a  $\log_{10}$  transformation. Clustering and plotting of the  
290 heatmaps was done with R package pheatmap 1.0.12 (Kolde, 2019). The cut point at 12 clusters was  
291 subjectively chosen for plotting; cutting introduces visual breaks without changing the cluster tree  
292 or the heatmap in any other way. The ordering of the tree was done with R package dendsort 0.3.3  
293 (Sakai *et al.*, 2014).

294

## 295 **2.5 Quantitative real-time PCR and data analysis**

296

297 Transcript abundance of selected genes was measured with qRT-PCR from four biological  
298 replicates and collected both at 6 h and 12 h. At 6 h the same RNA extracts were used for qRT-PCR  
299 as for RNA-seq, but without pooling. The qRT-PCR was done according to Rai *et al.* (2019) using

300 primers listed in Table S1. In every run, normalized expression values were scaled to sample *Ler*  $\lambda$   
301 > 400 nm,  $\log_{10}$  transformed, and exported from qbase<sup>PLUS</sup> for statistical analyses in R. Linear  
302 mixed-effect models with block as a random factor were fitted using function lme from package  
303 ‘nlme’ 3.1-137 (Pinheiro *et al.*, 2018). Factorial ANOVA was used to assess the significance of the  
304 main effects (treatment, genotype and exposure time) and of the interactions (treatment  $\times$  genotype,  
305 treatment  $\times$  exposure time, genotype  $\times$  exposure time, and treatment  $\times$  genotype  $\times$  exposure time).  
306 Function fit.contrast from package gmodels 2.18.1 (Warnes *et al.*, 2018) was used to fit pairwise  
307 contrasts defined *a priori* and *P*-values adjusted with function p.adjust in R (Holm, 1979). Figures  
308 were plotted using R package ggplot2 3.1.0 (Wickham, 2009).

309

## 310 **2.6 In vitro absorption spectra of UVR8 protein**

311

312 Recombinant UVR8 was produced and isolated from *Escherichia coli* with small variations from  
313 the original procedure described by Wu *et al.* (2012). The *E. coli* codon-optimized gene for  
314 Arabidopsis UVR8 was introduced into the pET11a expression vector generating a construct  
315 carrying an N-terminal 6 $\times$ His-tag (Genscript). The construct was verified by DNA-sequencing and  
316 transformed into the *E. coli* expression host strain BL21. For the recombinant production of  
317 functional UVR8, the N-terminal 6 $\times$ His-tagged UVR8 was overexpressed overnight at 18 °C using  
318 0.2 mM  $\beta$ -d-thiogalactopyranoside for induction (Wu *et al.*, 2012). Following the overnight  
319 induction, cells were harvested by centrifugation and flash-frozen in liquid nitrogen after which cell  
320 pellets were stored at -80 °C. Upon purification of recombinant UVR8, cells were lysed by  
321 sonication and soluble protein was separated from insoluble fractions by centrifugation. Further  
322 isolation of His-tagged UVR8 was accomplished by immobilized metal-affinity chromatography  
323 using a two segmented linear gradient of imidazole. Eluted fractions containing UVR8 was further  
324 purified to homogeneity using size-exclusion chromatography as verified by SDS-PAGE.  
325 Functionality was verified by electrophoresis assay and fluorescence quenching as described by Wu  
326 *et al.* (2012). The UV/Vis absorbance spectrum of UVR8 protein was measured by a standard  
327 protocol using a spectrophotometer (Shimadzu UV-1800). To improve the signal-to-noise ratio for  
328 spectral regions covering both long and short wavelengths, two separate data sets were recorded for  
329 two concentrations of UVR8 protein, 57.0  $\mu$ M and 4.5  $\mu$ M, respectively. A 25 mM Tris (pH8),  
330 150 mM NaCl buffer solution supplemented with 1 mM Beta-mercaptoethanol was used. Protein  
331 concentrations were determined using a theoretical absorption coefficient of 91900 M<sup>-1</sup>cm<sup>-1</sup> at  
332 280 nm as determined by the ProtParam data server available through the SIB Swiss Institute of  
333 Bioinformatics (Gasteiger *et al.*, 2005).

334

## 335 **2.7 In vitro monomerization of purified UVR8 protein**

336

337 His-tagged *Arabidopsis thaliana* full-length UVR8 was produced in *Nicotiana benthamiana* after  
338 *Agrobacterium tumefaciens* transfection using the pEAQ-HT plasmid (Sainsbury *et al.*, 2009) as  
339 expression vector. Purification of UVR8 was accomplished using Ni-NTA immobilized metal-  
340 affinity and size-exclusion chromatography. Purified UVR8 protein was exposed to UV  
341 wavelengths in a 50  $\mu$ l cuvette using a pulsed Opolette 355+UV tunable laser (Opotek Inc. USA)  
342 with a thermostatic cuvette holder at 4 °C, as described in Díaz-Ramos *et al.* (2018), using doses  
343 between 1.9 and 6.2  $\mu$ mol. After exposure, samples were added to 4 $\times$ SDS sample buffer (250 mM  
344 Tris-HCl pH 6.8, 2% (w/v) SDS, 20% (v/v)  $\beta$ -mercaptoethanol, 40% (v/v) glycerol, 0.5% (w/v)  
345 bromophenol blue) (O'Hara & Jenkins, 2012) and were subsequently analyzed by SDS-PAGE  
346 without boiling (Rizzini *et al.*, 2011). Gels were stained with Coomassie blue to visualize the dimer  
347 and monomer bands.

348

## 349 **3 RESULTS**

350

### 351 **3.1 Gene expression mediated by UVR8 and CRYs after 6 h of sunlight exposure**

352

353 To get full assessment of changes in transcript abundances induced by sunlight, we performed  
354 RNA-seq from samples collected after 6 h of exposure of plants to filtered sunlight. RNA-seq  
355 libraries from the same genotype and treatment clustered together showing consistency among  
356 biological replicates (Figure S3). Furthermore, we validated the expression profiles obtained by  
357 RNA-seq with qRT-PCR using 11 genes responsive to UV radiation, and/or blue light, or involved  
358 in hormone responses (Table S1). The high positive correlation,  $R^2 = 0.85$ , between the two  
359 methods validates the RNA-seq data (Figure S4).

360

361 As shown in the Venn diagrams (Figure 2a), in wild type *Ler*, out of 3741 DEGs, 2786 responded  
362 to blue light (868 UP, 1918 DOWN), 960 to UV-A (406 UP, 554 DOWN) and 653 to UV-B (343  
363 UP, 310 DOWN). Only 101 DEGs responded to all three solar wavebands UV-B, UV-A and blue.  
364 Moreover, less than half of the DEGs responding to UV-B were specific, as the remaining ones  
365 responded also to UV-A, blue or both. In contrast, of the DEGs responding to UV-A or blue, more  
366 than half were specific (Figure 2a).

367

368 In *uvr8-2*, out of 2095 DEGs only 53 (35 UP, 18 DOWN) responded to UV-B (Figure **2b**). The  
369 number of DEGs responding to UV-A was only 1/3 of that in *Ler* (356 differentially expressed, DE;  
370 125 UP, 231 DOWN) while also the number of DEGs responding to blue light was only 2/3 of that  
371 in *Ler* (1849 DE; 763 UP, 1086 DOWN) (Figure 2a,b). Furthermore, 1/3 of the DEGs responding to  
372 blue in *uvr8-2* were unique and not shared by *Ler* and *cry1cry2* (Figure S5). Thus, the results  
373 confirm our hypothesis that UVR8 plays a role in UV-A perception and also indicate that functional  
374 UVR8 modulates gene expression responses to solar blue wavelengths.

375

376 In *cry1cry2*, out of 2948 DEGs only 139 (87 UP, 52 DOWN) responded to solar blue light (Figure  
377 2c). Surprisingly for this mutant, out of the 2948 DEGs, 1272 (425 UP, 847 DOWN) still responded  
378 to UV-A (Figure 2c). Also, the number of DEGs responding to UV-B increased from 653 in *Ler* to  
379 2040 (784 UP, 1256 DOWN) in *cry1cry2* (Figure 2a,c).

380

381 To explore the UV-A signaling roles of UVR8 and CRYs in more detail, we next assessed the  
382 effects of longer and shorter wavelength regions within UV-A by comparing responses between  
383 pairs of filters: UV-A<sub>sw</sub> (>315 nm vs >350 nm) and UV-A<sub>lw</sub> (>350 nm vs >400 nm) (Figure 1). In  
384 *Ler*, out of 190 DEGs, 166 responded to UV-A<sub>sw</sub> (113 UP, 53 DOWN) and only 26 to UV-A<sub>lw</sub> (16  
385 UP, 10 DOWN), with only 2 DEGs shared between the two treatments (Figure 3a). In *uvr8-2*, out of  
386 77 DEGs, 7 (3 UP, 4 DOWN) responded to UV-A<sub>sw</sub>, while 72 (17 UP, 55 DOWN) to UV-A<sub>lw</sub>  
387 (Figure 3b). In *cry1cry2*, out of 1057 DEGs, 1050 (340 UP, 710 DOWN) responded to UV-A<sub>sw</sub> and  
388 only 16 (8 UP, 8 DOWN) to UV-A<sub>lw</sub> (Figure 3c). The number of DEGs responding to UV-A<sub>sw</sub> in  
389 *cry1cry2* was more than six times those responding to UV-A<sub>sw</sub> in *Ler*, a similar but stronger effect  
390 to that of UV-B (Figure 3a,c). Furthermore, 3/4 and 9/10 of the DEGs responding to UV-B and UV-  
391 A<sub>sw</sub>, respectively, in *cry1cry2* were unique and not shared by *Ler* or *uvr8-2* (Figure S5). Here, it  
392 should be noted that the individual numbers of DEGs under UV-A<sub>sw</sub> and UV-A<sub>lw</sub> add up to a  
393 smaller number than the number of DEGs for whole UV-A region (315–400 nm) (cf. Figures 3 and  
394 2). This difference mainly arises from statistically comparing pairs of treatments that correspond to  
395 smaller (UV-A<sub>sw</sub> and UV-A<sub>lw</sub>) or larger (whole UV-A) amounts of sunlight attenuation.

396

397 We next tested whether the requirement of UVR8 vs CRYs observed within the UV-A remained  
398 valid when including wavelengths in the UV-B and blue bands in the analysis. For this test, DEGs  
399 responding to  $\lambda < 350$  nm (contrast between >290 nm vs >350 nm) and  $\lambda > 350$  nm (contrast  
400 between >350 nm vs >500 nm) were quantified (Figure 4). The number of DEGs responding to  $\lambda <$   
401 350 nm in *uvr8-2* drastically decreased to 1/37 of those in *Ler* while the number of those

402 responding in *cry1cry2* increased to 2.7 times of those in *Ler*. The number of DEGs responding to  $\lambda$   
403  $> 350$  nm in *cry1cry2* decreased to 1/35 of those in *Ler*, while the number of those responding in  
404 *uvr8-2* also decreased but only to 4/5 of those in *Ler* (Figure 4). This test indicates that in sunlight  
405 functional UVR8 is required for transcriptome-wide response to  $\lambda < 350$  nm and CRYs are required  
406 for those to  $\lambda > 350$  nm and that functional CRYs antagonize this transcriptome-wide response to  $\lambda$   
407  $< 350$  nm.

408

409 Our lists of DEGs for the 12 waveband-contrast  $\times$  genotype combinations were enriched for 45  
410 KEGG metabolic pathways in total (Figure S6a-c). The analysis showed that UVR8 mediated the  
411 expression of genes involved in all enriched metabolic processes induced by UV-B and UV-A<sub>sw</sub> in  
412 *Ler* and *cry1cry2*. Since the flavonoid biosynthesis pathway was still enriched in *uvr8-2* by UV-B,  
413 dependence on UVR8 was partial (Figure S6a,b). Expression of genes involved in ribosome  
414 biogenesis, protein processing and endocytosis under solar blue required functional UVR8 (Figure  
415 S6a,b). CRYs mediated the expression of genes involved in most metabolic pathways regulated by  
416 blue light in *Ler* and *uvr8-2*, as these responses were missing in *cry1cry2*. The cases where the  
417 response to blue light was not fully dependent on CRYs were flavonoid biosynthesis, diterpenoid  
418 biosynthesis, phenylalanine metabolism, circadian rhythm, vitamin B6 metabolism,  
419 phenylpropanoid biosynthesis. Strikingly, many pathways including photosynthesis, glucosinolates  
420 biosynthesis, and plant hormone signal transduction were over-represented in *cry1cry2* compared to  
421 *Ler* in response to UV-B and UV-A<sub>sw</sub> (Figure S6a,c).

422

### 423 **3.2 Photon absorption and monomerization of UVR8**

424

425 To evaluate whether the actions of UVR8 and CRYs at  $\lambda < 350$  nm and  $\lambda > 350$  nm are consistent  
426 with their absorption spectra, we estimated the relative number of photons absorbed by both  
427 photoreceptors given the solar spectral irradiance on the sampling day under each filter (Figure 5).  
428 For UVR8 we used a newly measured absorption spectrum extending into the visible region (Figure  
429 S7), while for CRYs we used a published absorption spectrum for CRY2 (Banerjee *et al.*, 2007). As  
430 a result of the shape of the solar spectrum, the estimates showed that UV-A<sub>sw</sub> was the band where  
431 UVR8 was predicted to absorb most photons. Relative to these maxima, UVR8 was predicted to be  
432 the main UV-A<sub>sw</sub> photoreceptor. In the UV-A<sub>lw</sub> our estimates showed that both CRYs and UVR8  
433 absorbed a large number of photons (Figure 5). While UVR8 absorbed a considerable number of  
434 blue photons, CRY2 absorbed very few UV-B photons.

435

436 As monomerization of UVR8 is required for UV-B signaling (Rizzini *et al.*, 2011), we assessed *in*  
437 *vitro* if laser radiation of different wavelengths within the UV-B and UV-A bands can monomerize  
438 purified UVR8 protein. We found that UVR8 monomerized in response to UV wavelengths in the  
439 range 300–335 nm but not in 340–350 nm (Figure 6).

440

### 441 **3.3 Cis-motif enrichment**

442

443 As enrichment of DNA binding motifs can inform about the putative involvement of TFs in the  
444 observed gene-expression responses (McLeay & Bailey, 2010), we assessed *in silico* the enrichment  
445 of known *cis*-regulatory elements in the promoter regions of the DEGs from each waveband-  
446 genotype combination (Figures 7, S8). The analysis identified 187 putative regulatory TFs whose  
447 binding motifs were significantly enriched among the DEGs for at least one waveband-genotype  
448 combination (Figures 7, S8). The TFs grouped into 12 distinct clusters based on the similarity of  
449 their enrichment patterns across four waveband contrasts and three genotypes (Figure 7). Out of  
450 these TFs, 53 were themselves differentially expressed. Clusters A, C, D, F, H and I were  
451 homogeneous with respect to TF family, whereas the rest were heterogeneous. Within  
452 homogeneous clusters several promoter motifs were enriched (Figures 7, S8).

453

454 In cluster A, several MYB TFs including MYB111 were predicted to regulate the expression of  
455 genes with increased transcript abundance in response to UV-B and blue in all genotypes, while in  
456 response to UV-A<sub>sw</sub> significant enrichment was found only in *Ler* and *cry1cry2* (cluster A, Figure  
457 7). TFs in this group were the only ones enriched for genes responding to UV-B in *uvr8-2*. Out of  
458 these seven TFs, four were themselves differentially expressed in response to the treatments.

459

460 HY5, PIF1, PIF3, PIF4, PIF7, BES1 were grouped in cluster B, and were predicted to regulate the  
461 expression of genes with increased transcript abundance in response to solar UV-B in *Ler* and  
462 *cry1cry2* (Figure 7) and of genes with either increased or decreased transcript abundance in  
463 response to solar blue in *Ler* and *uvr8-2*. Most of these same TFs were enriched for two additional  
464 responses only in *cry1cry2*: decreased transcript abundance by UV-B and increased transcript  
465 abundance by UV-A<sub>sw</sub>. Out of these 15 TFs, seven, including HY5, PIF1, PIF3, PIF4 and BES1,  
466 were themselves differentially expressed. Cluster C which follows a response pattern similar to that  
467 of cluster B groups 14 bZIP TFs of which three were differentially expressed.

468

469 Eleven members of HD-ZIP TFs including HAT5 grouped in cluster D and were enriched for  
470 decreased transcript abundance only in response to blue light in *Ler* and *uvr8-2* but in response to  
471 UV-B and UV-A<sub>sw</sub> only in *cry1cry2* (Figure 7). Out of these 11 TFs, four including HAT5 were  
472 differentially expressed. Cluster E which follows a response pattern similar to that of cluster D  
473 contains TFs from a mix of families of which eight were differentially expressed.

474

475 Five GATA TFs were enriched for DEGs repressed by blue only in *Ler* whereas in the other two  
476 mutants these TFs were not enriched for any response (cluster F, Figure 7). WRKY TFs were  
477 enriched only for DEGs with decreased expression in response to UV-A<sub>sw</sub> in *cry1cry2* (cluster G).  
478 The number of differentially expressed TFs were 1 and 9 in clusters F and G, respectively. The  
479 remaining clusters (H-L) showed multiple but poorly defined patterns of enrichment.

480

### 481 **3.4 Transcript abundance after 6 h and 12 h**

482

483 We used qRT-PCR to determine changes in transcript abundance after 6 h (mid-day) and after 12 h  
484 (before sunset) of exposure to filtered solar radiation, allowing the assessment of transcript  
485 abundance at two times of the day when solar UV-B:UV-A photon ratio was very different. We  
486 tested 11 genes (Figures 8, S9). The three-way interaction, treatment × genotype × exposure time,  
487 was significant for four genes: *RUP2* (involved in UVR8 signaling), *CHALCONE SYNTHASE*  
488 (*CHS*) and *CHALCONE ISOMERASE (CHI)* (flavonoid biosynthesis); and *SOLANESYL*  
489 *DIPHOSPHATE SYNTHASE 1 (SPS1)* (ubiquinone biosynthesis) (Figure 8, Table S2). This  
490 indicates that in sunlight the role of UVR8 and CRYs in the regulation of transcript abundance of  
491 these genes changed in time. For these four genes across all genotypes, the response to filter  
492 treatments at 6 h was stronger than at 12 h.

493

494 Solar UV-B at 6 h increased transcript abundance of *CHI* and *CHS* in all genotypes and of *RUP2* in  
495 *Ler* and *cry1cry2* but not in *uvr8-2* (Figure 8). This response to UV-B was stronger in *cry1cry2* than  
496 in *Ler* for all these genes. Solar UV-A<sub>sw</sub> at 6 h increased transcript abundance of *CHI*, *CHS*, *RUP2*  
497 and *SPS1* in *Ler* and *cry1cry2* but not in *uvr8-2*. As for UV-B, the transcript abundance response to  
498 6 h of UV-A<sub>sw</sub> was stronger in *cry1cry2* than in *Ler* for these four genes. Both solar UV-B and UV-  
499 A<sub>sw</sub> at 12 h increased the abundance of *CHS*, but only in *cry1cry2*. These results support regulation  
500 of transcript abundance by UVR8 in both UV-B and UV-A<sub>sw</sub>, antagonized by CRYs.

501

502 Solar UV-A<sub>Iw</sub> at both 6 h and 12 h decreased the transcript abundance of *CHS* in *cry1cry2* (Figure  
503 8). UV-A<sub>Iw</sub> at 12 h increased the transcript abundance of *RUP2* in *Ler* and of *SPS1* in both *Ler* and  
504 *uvr8-2* but not in *cry1cry2*. Overall, transcript abundance was less responsive to UV-A<sub>Iw</sub> than to  
505 UV-A<sub>sw</sub>. Solar blue light at 6 h increased transcript abundance of *CHI*, *CHS* and *RUP2* in all  
506 genotypes whereas of *SPS1* in *Ler* and *uvr8-2* but not in *cry1cry2*. Blue light at 12 h increased the  
507 abundance of *CHI* and *RUP2* only in *Ler* and *uvr8-2*, and of *CHS* in all three genotypes, but less in  
508 *cry1cry2*. These results support regulation of transcript abundance by CRYs in UV-A<sub>Iw</sub> and blue  
509 light.

510

## 511 **4 DISCUSSION**

512

### 513 **4.1 Effective range of wavelengths for action of UVR8 and CRYs in sunlight**

514

515 In plant photobiology the consensus has been that UVR8 and CRYs function as UV-B and  
516 blue/UV-A photoreceptors, respectively (Ahmad & Cashmore, 1993; Rizzini *et al.*, 2011).  
517 However, here we show that UVR8 mediates transcriptome-wide changes in response to both solar  
518 UV-A<sub>sw</sub> and UV-B (Figures 2–4). Assuming that UVR8 monomers are required for signaling and  
519 response (Rizzini *et al.*, 2011), for UVR8 to mediate responses to UV-A<sub>sw</sub> it must absorb enough  
520 photons at these longer wavelengths and monomerize. Our *in silico* estimates based on spectral  
521 absorbance predict that UVR8 absorbs more UV-A<sub>sw</sub> photons than UV-B photons in sunlight  
522 (Figure 5), because sunlight contains at least 30 times more UV-A<sub>sw</sub> photons than UV-B photons  
523 (Aphalo, 2018). This explains why the role of UVR8 in UV-A<sub>sw</sub> perception has not been observed  
524 in earlier studies using artificial light with unrealistically high UV-B:PAR and low UV-A:PAR  
525 ratios. We also show that *in vitro* UVR8 dimers convert to monomers when exposed to radiation of  
526 wavelengths between 300 nm and 335 nm but not in response to longer wavelengths (Figure 6). As  
527 the UVR8 protein does absorb photons at wavelengths longer than 335 nm, a possible explanation  
528 for this transition between 335 nm and 340 nm is a threshold in the energy per photon required for  
529 monomerization. The dose we used at 335 nm was more than 3000 times the maximum used by  
530 Díaz-Ramos *et al.* (2018), who observed *in vitro* almost complete monomerization at 310 nm, the  
531 longest wavelength they investigated.

532

533 We also found that UVR8 affected blue light-induced gene expression, as fewer and in part  
534 different genes responded to blue light in *uvr8-2* when compared to *Ler* (Figures 2a,b, S5). This  
535 effect was unexpected, as the effect of blue light was assessed in a background of strongly



536 attenuated UV-B and UV-A. Furthermore, KEGG pathway analysis indicates that functional UVR8  
537 might be required for blue-light-dependent expression of genes involved in ribosome biogenesis,  
538 protein processing and endocytosis (Figures S6a-c). Our estimates also predict that photon  
539 absorption by UVR8 in sunlight extends as far as the blue region (Figure S7), where we observed  
540 UVR8-dependent modulation of these specific responses to solar blue instead of a clear-cut  
541 requirement as at shorter wavelengths. Although evidence for perception of blue light by UVR8 is  
542 weak, the lack of monomerization in response to wavelengths longer than 335 nm suggests that  
543 photoreception by UVR8 at longer wavelengths would have to depend on a different mechanism.

544

545 Our transcriptomic data at 6 h (solar noon) indicate that CRYs are the main photoreceptors  
546 mediating gene expression responses to solar blue and UV-A<sub>lw</sub>, but not to UV-A<sub>sw</sub>. This contrasts  
547 with the currently accepted role of CRYs in perception of the whole UV-A waveband (Yu *et al.*,  
548 2010). Yet, the absence of CRYs increased the number of DEGs up to three times in response to  
549 UV-B and up to six times in response to UV-A<sub>sw</sub> (Figures 2a,c and 3a,c), an unexpectedly large  
550 effect affecting many metabolic processes (Figure S6). However, while CRYs absorb comparatively  
551 fewer photons at these shorter wavelengths than in the blue, the effect of UV-B and UV-A<sub>sw</sub>  
552 exposure was assessed in a background of UV-A<sub>lw</sub> and blue radiation, a condition under which  
553 CRY signaling was activated in the WT but not in *cry1cry2*. Thus, the previously described  
554 negative regulation of four UVR8-mediated genes by CRYs in UV-B and UV-A<sub>sw</sub> (Rai *et al.*, 2019)  
555 was now expanded to the whole transcriptome indicating an interaction between UVR8 and CRYs  
556 leading to wide-ranging regulation of primary and secondary metabolism (Figures 2–4, S6).  
557 Furthermore, this negative regulation was observed using qRT-PCR at both 6 h and 12 h for *CHS*  
558 (Figure 8) indicating that this effect can persist until the end of the photoperiod even though UV-B  
559 irradiance was very low at this time, suggesting a carry-over effect. The transcript abundance of  
560 *RUP1* and *RUP2* was increased in response to UV-A<sub>sw</sub> in *cry1cry2* compared to *Ler* (Figure 8),  
561 indicating that the crosstalk between UV-B/UV-A<sub>sw</sub> and UV-A<sub>lw</sub>/blue signaling pathways may  
562 involve RUPs. In addition, a recent study demonstrated that both UVR8 and CRYs use VP motifs to  
563 compete for binding the WD40 domain of COP1 (Lau *et al.*, 2019). Therefore, crosstalk between  
564 the two signaling pathways could involve COP1. These earlier results together with our new  
565 observations provide a good starting point for future studies on the molecular mechanism of  
566 interaction between UVR8 and CRYs in sunlight and its relevance to plant adaptation and  
567 acclimation to diurnal and seasonal variation in the solar spectrum.

568

569 **4.2 Putative TFs behind different patterns of gene expression response**

570

571 Our promoter enrichment analysis highlights the possible roles of several TFs in controlling the  
572 observed gene expression responses downstream of UVR8 and CRYs. The analysis predicted that  
573 MYB TFs, known regulators of flavonol accumulation (Stracke *et al.*, 2007), regulate the  
574 expression of genes responding to UV-B partially independent of UVR8, and of those responding to  
575 UV-A<sub>sw</sub> through UVR8 (Figure 7, cluster A). The data also show that HAT5 and PIF5 (clusters D,  
576 E) are predicted to specifically regulate gene expression in response to solar blue through CRYs.  
577 These results in sunlight agree with a previous report where PIF5 is shown to function downstream  
578 of CRYs to mediate hypocotyl elongation in response to artificial blue light (Pedmale *et al.*, 2016).

579

580 Although earlier work has emphasized the role of HY5 as a master TF central to responses to UV  
581 radiation and blue light (Brown & Jenkins, 2008; Favory *et al.*, 2009; Gangappa & Botto, 2016), the  
582 array of response patterns of transcript abundance and motif enrichment observed here indicate that  
583 several TFs play key roles in downstream signaling leading to gene expression. In addition to HY5,  
584 the known regulators of UV and blue light signaling and photomorphogenesis including PIF1, PIF3,  
585 PIF4, PIF7 and BES1 (Hayes *et al.*, 2014; Gangappa & Botto, 2016; Pedmale *et al.*, 2016; Liang *et al.*  
586 *et al.*, 2018; Wang *et al.*, 2018) were predicted to regulate gene expression in response to solar UV-B  
587 through UVR8, and in response to solar blue through CRYs (Figure 7, cluster B). Our data also  
588 indicate that HY5, PIFs, BES1, HAT5, WRKYs and many other TFs could regulate the expression  
589 of genes responsive to UV-B or UV-A<sub>sw</sub> and require both UVR8 and CRYs (Figure 7, clusters B, C,  
590 D and G). This shows that both UVR8 and CRY signaling employ some of the same TFs for gene  
591 expression. However, the multiple points of interaction for crosstalk between UV-B, UV-A<sub>sw</sub>, UV-  
592 A<sub>lw</sub> and blue light signaling pathways downstream of UVR8, CRYs and other photoreceptors  
593 remain to be explored.

594

### 595 **4.3 Implications and conclusions**

596

597 With few exceptions, gene expression in response to solar UV-B and UV-A<sub>sw</sub> depended on UVR8,  
598 while that in response to UV-A<sub>lw</sub> and blue light depended on CRYs. Why the “UV-B  
599 photoreceptor” UVR8 played a role in the perception of solar UV-A<sub>sw</sub> can be explained by the  
600 numbers of solar UV-B and UV-A<sub>sw</sub> photons predicted to be absorbed by UVR8, a physico-  
601 chemical mechanism. Our prediction of photons absorbed by UVR8 was made possible by the new  
602 spectral absorbance data we report, demonstrating the usefulness of extending such measurements  
603 far along the tails of absorption spectra. We also observed *in vitro* monomerization of UVR8 dimers

604 exposed to wavelengths between 300 and 335 nm but not when exposed to longer ones, extending  
605 previous knowledge into longer wavelengths. This lack of monomerization may explain why UVR8  
606 does not play an important role in the perception of UV-A<sub>lw</sub>. Thus, we describe the mechanism by  
607 which the steep slope of the solar spectrum in the UV region shifts perception of solar radiation by  
608 UVR8 towards longer wavelengths than frequently assumed.

609

610 When considering both UVR8 and CRYs, we observed that the transcriptome-wide response  
611 triggered by UV-B and UV-A<sub>sw</sub> exposure was very strongly and negatively regulated by CRYs. The  
612 reverse effect, modulation by UVR8 of gene expression in response to blue light was also observed  
613 although it was much weaker. These results demonstrate for the first time the extent of the effect of  
614 interactions downstream of UVR8 and CRYs on the transcriptome. These data also allowed us to  
615 putatively identify several metabolic pathways affected by the interaction.

616

617 Specific groups of TFs were predicted *in silico* to control cascades of gene expression  
618 corresponding to different patterns of transcriptome response to wavelengths across genotypes,  
619 patterns which can only arise as the result of a complex signaling network including multiple points  
620 of interaction downstream of UVR8 and CRYs. This prediction highlights that current models of  
621 signaling downstream of UVR8 and CRYs, rather unsurprisingly, describe only the top portion of a  
622 much deeper and ramified signaling network. As our study demonstrates, experiments combining  
623 the use of multiple light treatments and multiple mutants in a factorial design allow teasing out  
624 some of the signaling complexity that is missing from current models. The *in-silico* predictions we  
625 report can guide the development of hypotheses about the mechanisms and players involved in  
626 signaling, hypotheses that will need to be tested in future experiments.

627

628 As the wavelength boundaries for effective sensitivity of UVR8- and CRY-mediated perception of  
629 sunlight do not coincide with the definitions of UV-B and UV-A radiation in common use (Björn,  
630 2015), we consider that quantification of solar radiation based on these definitions is only  
631 marginally useful when studying sunlight perception by plants, i.e., photomorphogenesis rather than  
632 stress damage. Even more important, is that in both irradiation- and waveband-attenuation  
633 experiments different regions within UV-A will trigger responses through different photoreceptors,  
634 possibly resulting in contradictory or confusing results. In the present study, splitting the UV-A  
635 waveband at 350 nm into UV-A<sub>sw</sub> and UV-A<sub>lw</sub> was the key to revealing the effective roles of UVR8  
636 and CRYs in the perception of UV radiation in sunlight. Thus, as we routinely do for red and far-red

637 light in the visible, it is also very profitable to use plant-photomorphogenesis-specific waveband  
638 definitions to characterize radiation in the UV-A region.

639

## 640 **6 ACKNOWLEDGEMENTS**

641

642 We acknowledge Petri Auvinen (University of Helsinki) for RNA-seq. Funding by Academy of  
643 Finland (252548) to PJA, and (307335) to MB and JS; EDUFI Fellowship, Finnish Cultural  
644 Foundation and Doctoral Program in Plant Sciences funding (University of Helsinki) to NR;  
645 Knowledge foundation (20130164) and Swedish Research Council Formas (942-2015-516) to ÅS;  
646 Strategic Young Researchers Recruitment Programme (Örebro University) to LOM.

647

## 648 **7 AUTHORSHIP**

649

650 PJA and LOM planned the research. NR, MB, ÅS, PJA, and LOM designed experiments. NR,  
651 AO'H, DF, KR, FW, AVL, and LOM performed experiments. NR, OS, JS, PJA, and LOM  
652 analyzed data. NR, PJA and LOM wrote the paper with contributions from MB, JS, ÅS, GIJ, and  
653 TL. All authors commented and approved the manuscript. PJA and LOM contributed equally as  
654 senior authors.

655

656

657 **References**

658

659 Ahmad M., Cashmore A.R. (1993). HY4 gene of *A. thaliana* encodes a protein with characteristics  
660 of a blue-light photoreceptor. *Nature*, 366, 162–166.

661 Ambrosini G., Groux R., Bucher P. (2018). PWMScan: a fast tool for scanning entire genomes with  
662 a position-specific weight matrix (J Hancock, Ed.). *Bioinformatics*, 34, 2483–2484.

663 Andrews S. (2014). FastQC A quality control tool for high throughput sequence data. Babraham  
664 Bioinformatics. URL <https://www.bioinformatics.babraham.ac.uk/projects/fastqc/> [accessed 12 June  
665 2019].

666 Aphalo P.J. (2015). The r4photobiology suite: spectral irradiance. *UV4Plants Bulletin*, 2015, 21–29.

667 Aphalo P.J. (2018). Exploring temporal and latitudinal variation in the solar spectrum at ground  
668 level with the TUV model. *UV4Plants Bulletin*, 2018, 45–56.

669 Banerjee R., Schleicher E., Meier S., Viana R.M., Pokorny R., Ahmad M., Bittl R., Batschauer A.  
670 (2007). The signaling state of Arabidopsis cryptochrome 2 contains flavin semiquinone. *The*  
671 *Journal of Biological Chemistry*, 282, 14916–14922.

672 Björn L.O. (2015). History Ultraviolet-A, B, and C. *UV4Plants Bulletin*, 2015, 17–18.

673 Blomster T., Salojärvi J., Sipari N., Brosché M., Ahlfors R., Keinänen M., Overmyer K.,  
674 Kangasjärvi J. (2011). Apoplastic reactive oxygen species transiently decrease auxin signaling and  
675 cause stress-induced morphogenic response in Arabidopsis. *Plant Physiology*, 157, 1866–1883.

676 Bolger A.M., Lohse M., Usadel B. (2014). Trimmomatic: a flexible trimmer for Illumina sequence  
677 data. *Bioinformatics*, 30, 2114–2120.

678 Bray N.L., Pimentel H., Melsted P., Pachter L. (2016). Near-optimal probabilistic RNA-seq  
679 quantification. *Nature Biotechnology*, 34, 525–527.

680 Breilsford C.C., Morales L.O., Nezval J., Kotilainen T.K., Hartikainen S.M., Aphalo P.J., Robson  
681 T.M. (2018). Do UV-A radiation and blue light during growth prime leaves to cope with acute high  
682 light in photoreceptor mutants of *Arabidopsis thaliana*? *Physiologia Plantarum*, 165, 537–554.

683 Brown B.A., Cloix C., Jiang G.H., Kaiserli E., Herzyk P., Kliebenstein D.J., Jenkins G.I. (2005). A  
684 UV-B-specific signaling component orchestrates plant UV protection. *Proceedings of the National*  
685 *Academy of Sciences of the United States of America*, 102, 18225–18230.

686 Brown B.A., Jenkins G.I. (2008). UV-B signaling pathways with different fluence-rate response  
687 profiles are distinguished in mature Arabidopsis leaf tissue by requirement for UVR8, HY5, and  
688 HYH. *Plant Physiology*, 146, 576–588.

689 Christie J.M., Arvai A.S., Baxter K.J., Heilmann M., Pratt A.J., O'Hara A., Kelly S.M., Hothorn  
690 M., Smith B.O., Hitomi K., *et al.* (2012). Plant UVR8 photoreceptor senses UV-B by tryptophan-  
691 mediated disruption of cross-dimer salt bridges. *Science*, 335, 1492–1496.

692 Cloix C., Kaiserli E., Heilmann M., Baxter K.J., Brown B.A., O'Hara A., Smith B.O., Christie J.M.,  
693 Jenkins G.I. (2012). C-terminal region of the UV-B photoreceptor UVR8 initiates signaling through  
694 interaction with the COP1 protein. *Proceedings of the National Academy of Sciences of the United*  
695 *States of America*, 109, 16366–16370.

696 Díaz-Ramos L.A., O'Hara A., Kanagarajan S., Farkas D., Strid Å., Jenkins G.I. (2018). Difference  
697 in the action spectra for UVR8 monomerisation and *HY5* transcript accumulation in Arabidopsis.  
698 *Photochemical and Photobiological Sciences*, 17, 1108–1117.

699 Emde C., Buras-Schnell R., Kylling A., Mayer B., Gasteiger J., Hamann U., Kylling J., Richter B.,  
700 Pause C., Dowling T., *et al.* (2016). The libRadtran software package for radiative transfer  
701 calculations (version 2.0.1). *Geoscientific Model Development*, 9, 1647–1672.

702 Favory J.-J., Stec A., Gruber H., Rizzini L., Oravec A., Funk M., Albert A., Cloix C., Jenkins G.I.,  
703 Oakeley E.J., *et al.* (2009). Interaction of COP1 and UVR8 regulates UV-B-induced  
704 photomorphogenesis and stress acclimation in Arabidopsis. *The EMBO Journal*, 28, 591–601.

705 Gangappa S.N., Botto J.F. (2016). The multifaceted roles of *HY5* in plant growth and development.  
706 *Molecular Plant*, 9, 1353–1365.

707 Gasteiger E., Hoogland C., Gattiker A., Duvaud S., Wilkins M.R., Appel R.D., Bairoch A. (2005).  
708 Protein identification and analysis tools on the ExPASy server. In *The Proteomics Protocols*  
709 *Handbook*, pp. 571–607. Humana Press, Totowa, New Jersey.

710 Gruber H., Heijde M., Heller W., Albert A., Seidlitz H.K., Ulm R. (2010). Negative feedback  
711 regulation of UV-B-induced photomorphogenesis and stress acclimation in Arabidopsis.  
712 *Proceedings of the National Academy of Sciences of the United States of America*, 107, 20132–  
713 20137.

714 Hayes S., Velanis C.N., Jenkins G.I., Franklin K.A. (2014). UV-B detected by the UVR8  
715 photoreceptor antagonizes auxin signaling and plant shade avoidance. *Proceedings of the National*  
716 *Academy of Sciences of the United States of America*, 111, 11894–11899.

717 Heijde M., Ulm R. (2013). Reversion of the Arabidopsis UV-B photoreceptor UVR8 to the  
718 homodimeric ground state. *Proceedings of the National Academy of Sciences of the United States of*  
719 *America*, 110, 1113–1118.

720 Holm S. (1979). A simple sequentially rejective multiple test procedure | BibSonomy. *Scandinavian*  
721 *Journal of Statistics*, 6, 65–70.

- 722 Huang X., Ouyang X., Yang P., Lau O.S., Chen L., Wei N., Deng X.W. (2013). Conversion from  
723 CUL4-based COP1-SPA E3 apparatus to UVR8-COP1-SPA complexes underlies a distinct  
724 biochemical function of COP1 under UV-B. *Proceedings of the National Academy of Sciences of*  
725 *the United States of America*, 110, 16669–16674.
- 726 Kaiserli E., Jenkins G.I. (2007). UV-B promotes rapid nuclear translocation of the Arabidopsis UV-  
727 B specific signaling component UVR8 and activates its function in the nucleus. *The Plant Cell*, 19,  
728 2662–2673.
- 729 Kallio M.A., Tuimala J.T., Hupponen T., Klemelä P., Gentile M., Scheinin I., Koski M., Käksi J.,  
730 Korpelainen E.I. (2011). Chipster: user-friendly analysis software for microarray and other high-  
731 throughput data. *BMC Genomics*, 12, 507.
- 732 Kerr J.B., Fioletov V.E. (2008). Surface ultraviolet radiation. *Atmosphere-Ocean*, 46, 159–184.
- 733 Khan A., Fornes O., Stigliani A., Gheorghe M., Castro-Mondragon J.A., van der Lee R., Bessy A.,  
734 Chèneby J., Kulkarni S.R., Tan G., *et al.* (2018). JASPAR 2018: update of the open-access database  
735 of transcription factor binding profiles and its web framework. *Nucleic Acids Research*, 46, D260–  
736 D266.
- 737 Kleine T., Kindgren P., Benedict C., Hendrickson L., Strand Å. (2007). Genome-wide gene  
738 expression analysis reveals a critical role for CRYPTOCHROME1 in the response of Arabidopsis  
739 to high irradiance. *Plant Physiology*, 144, 1391–1406.
- 740 Kolde R. (2019). pheatmap: Pretty Heatmaps. R package version 1.0.12. URL [https://cran.r-](https://cran.r-project.org/web/packages/pheatmap/index.html)  
741 [project.org/web/packages/pheatmap/index.html](https://cran.r-project.org/web/packages/pheatmap/index.html) [accessed 12 June 2019].
- 742 Lau K., Podolec R., Chappuis R., Ulm R., Hothorn M. (2019). Plant photoreceptors and their  
743 signaling components compete for binding to the ubiquitin ligase COP1 using their VP-peptide  
744 motifs. *The EMBO Journal*, 38, e102140.
- 745 Legendre P. (2018). lmodel2: Model II Regression. R package version 1.7-3. URL  
746 <https://CRAN.R-project.org/package=lmodel2> [accessed 12 June 2019].
- 747 Lian H.L., He S.B., Zhang Y.C., Zhu D.M., Zhang J.Y., Jia K.P., Sun S.X., Li L., Yang H.Q.  
748 (2011). Blue-light-dependent interaction of cryptochrome 1 with SPA1 defines a dynamic signaling  
749 mechanism. *Genes and Development*, 25, 1023–1028.
- 750 Liang T., Mei S., Shi C., Yang Y., Peng Y., Ma L., Wang F., Li X., Huang X., Yin Y., *et al.* (2018).  
751 UVR8 interacts with BES1 and BIM1 to regulate transcription and photomorphogenesis in  
752 Arabidopsis. *Developmental Cell*, 44, 512–523.
- 753 Lin C. (2000). Plant blue-light receptors. *Trends in Plant Science*, 5, 337–342.

- 754 Lindfors A., Heikkilä A., Kaurola J., Koskela T., Lakkala K. (2009). Reconstruction of solar  
755 spectral surface UV irradiances using radiative transfer simulations. *Photochemistry and*  
756 *Photobiology*, 85, 1233–1239.
- 757 Liu H., Liu B., Zhao C., Pepper M., Lin C. (2011a). The action mechanisms of plant  
758 cryptochromes. *Trends in Plant Science*, 16, 684–691.
- 759 Liu B., Yang Z., Gomez A., Liu B., Lin C., Oka Y. (2016). Signaling mechanisms of plant  
760 cryptochromes in *Arabidopsis thaliana*. *Journal of Plant Research*, 129, 137–148.
- 761 Liu H., Yu X., Li K., Klejnot J., Yang H., Lisiero D., Lin C. (2008). Photoexcited CRY2 interacts  
762 with CIB1 to regulate transcription and floral initiation in *Arabidopsis*. *Science*, 322, 1535–1539.
- 763 Liu B., Zuo Z., Liu H., Liu X., Lin C. (2011b). *Arabidopsis* cryptochrome 1 interacts with SPA1 to  
764 suppress COP1 activity in response to blue light. *Genes and Development*, 25, 1029–1034.
- 765 Mazzella M.A., Cerdán P.D., Staneloni R.J., Casal J.J. (2001). Hierarchical coupling of  
766 phytochromes and cryptochromes reconciles stability and light modulation of *Arabidopsis*  
767 development. *Development*, 128, 2291–2299.
- 768 McCarthy D.J., Chen Y., Smyth G.K. (2012). Differential expression analysis of multifactor RNA-  
769 Seq experiments with respect to biological variation. *Nucleic Acids Research*, 40, 4288–4297.
- 770 McLeay R.C., Bailey T.L. (2010). Motif Enrichment Analysis: a unified framework and an  
771 evaluation on ChIP data. *BMC Bioinformatics*, 11, 165.
- 772 Morales L.O., Brosché M., Vainonen J., Jenkins G.I., Wargent J.J., Sipari N., Strid Å., Lindfors  
773 A.V., Tegelberg R., Aphalo P.J. (2013). Multiple roles for UV RESISTANCE LOCUS8 in  
774 regulating gene expression and metabolite accumulation in *Arabidopsis* under solar ultraviolet  
775 radiation. *Plant Physiology*, 161, 744–759.
- 776 Neff M.M., Chory J. (1998). Genetic interactions between Phytochrome A, Phytochrome B, and  
777 Cryptochrome 1 during *Arabidopsis* development. *Plant Physiology*, 118, 27–36.
- 778 O'Hara A., Jenkins G.I. (2012). In vivo function of tryptophans in the *Arabidopsis* UV-B  
779 photoreceptor UVR8. *The Plant Cell*, 24, 3755–3766.
- 780 O'Malley R.C., Huang S.-S.C., Song L., Lewsey M.G., Bartlett A., Nery J.R., Galli M., Gallavotti  
781 A., Ecker J.R. (2016). Cistrome and epicistrome features shape the regulatory DNA landscape. *Cell*,  
782 165, 1280–1292.
- 783 Ohgishi M., Saji K., Okada K., Sakai T. (2004). Functional analysis of each blue light receptor,  
784 cry1, cry2, phot1, and phot2, by using combinatorial multiple mutants in *Arabidopsis*. *Proceedings*  
785 *of the National Academy of Sciences*, 101, 2223–2228.



786 Pedmale U.V., Huang S.C., Zander M., Cole B.J., Hetzel J., Ljung K., Reis P.A.B., Sridevi P., Nito  
787 K., Nery J.R., *et al.* (2016). Cryptochromes interact directly with PIFs to control plant growth in  
788 limiting blue light. *Cell*, 164, 233–245.

789 Pinheiro J., Bates D., DebRoy S., Sarkar D., R Core Team. (2018). nlme: Linear and Nonlinear  
790 Mixed Effects Models. URL <https://cran.r-project.org/web/packages/nlme/index.html> [accessed 12  
791 June 2019].

792 Podolec R., Ulm R. (2018). Photoreceptor-mediated regulation of the COP1/SPA E3 ubiquitin  
793 ligase. *Current Opinion in Plant Biology*, 45, 18–25.

794 R Core Team. (2018). A language and environment for statistical computing. R Foundation for  
795 Statistical Computing. URL <https://www.r-project.org/> [accessed 12 June 2019].

796 Rai N., Neugart S., Yan Y., Wang F., Siipola S.M., Lindfors A.V., Winkler J.B., Albert A., Brosché  
797 M., Lehto T., *et al.* 2019. How do cryptochromes and UVR8 interact in natural and simulated  
798 sunlight? *Journal of Experimental Botany*, 70, 4975–4990.

799 Ritchie M.E., Phipson B., Wu D., Hu Y., Law C.W., Shi W., Smyth G.K. (2015). limma powers  
800 differential expression analyses for RNA-sequencing and microarray studies. *Nucleic Acids*  
801 *Research*, 43, e47–e47.

802 Rizzini L., Favory J.-J., Cloix C., Faggionato D., O’Hara A., Kaiserli E., Baumeister R., Schäfer E.,  
803 Nagy F., Jenkins G.I., *et al.* (2011). Perception of UV-B by the Arabidopsis UVR8 protein. *Science*,  
804 332, 103–106.

805 Robinson M.D., McCarthy D.J., Smyth G.K. (2010). edgeR: a Bioconductor package for  
806 differential expression analysis of digital gene expression data. *Bioinformatics*, 26, 139–140.

807 Sainsbury F., Thuenemann E.C., Lomonosoff G.P. (2009). pEAQ: versatile expression vectors for  
808 easy and quick transient expression of heterologous proteins in plants. *Plant Biotechnology Journal*,  
809 7, 682–693.

810 Sakai R., Winand R., Verbeiren T., Moere A.V., Aerts J. (2014). dendsort: modular leaf ordering  
811 methods for dendrogram representations in R. *F1000Research* 3: 177.

812 Siipola S.M., Kotilainen T., Sipari N., Morales L.O., Lindfors A.V., Robson T.M., Aphalo P.J.  
813 (2015). Epidermal UV-A absorbance and whole-leaf flavonoid composition in pea respond more to  
814 solar blue light than to solar UV radiation. *Plant, Cell and Environment*, 38, 941–952.

815 Stracke R., Ishihara H., Huep G., Barsch A., Mehrrens F., Niehaus K., Weisshaar B. (2007).  
816 Differential regulation of closely related R2R3-MYB transcription factors controls flavonol  
817 accumulation in different parts of the *Arabidopsis thaliana* seedling. *The Plant Journal*, 50, 660–  
818 677.

819 Wang W., Lu X., Li L., Lian H., Mao Z., Xu P., Guo T., Xu F., Du S., Cao X., *et al.* (2018).  
820 Photoexcited CRYPTOCHROME1 interacts with dephosphorylated BES1 to regulate  
821 brassinosteroid signaling and photomorphogenesis in Arabidopsis. *The Plant Cell*, 30, 1989–2005.  
822 Wang H., Ma L.G., Li J.M., Zhao H.Y., Deng X.W. (2001). Direct interaction of Arabidopsis  
823 Cryptochromes with COP1 in light control development. *Science*, 294, 154–158.  
824 Wang Q., Zuo Z., Wang X., Gu L., Yoshizumi T., Yang Z., Yang L., Liu Q., Liu W., Han Y.-J., *et al.*  
825 *al.* (2016). Photoactivation and inactivation of *Arabidopsis* cryptochrome 2. *Science*, 354, 343–347.  
826 Warnes G.R., Bolker B., Lumley T., Johnson R.C. (2018). gmodels: Various R programming tools  
827 for model fitting version 2.18.1 from CRAN. URL [https://cran.r-](https://cran.r-project.org/web/packages/gmodels/index.html)  
828 [project.org/web/packages/gmodels/index.html](https://cran.r-project.org/web/packages/gmodels/index.html) [accessed 12 June 2019].  
829 Wickham H. (2009). Ggplot2: elegant graphics for data analysis. Springer.  
830 Wu D., Hu Q., Yan Z., Chen W., Yan C., Huang X., Zhang J., Yang P., Deng H., Wang J., *et al.*  
831 (2012). Structural basis of ultraviolet-B perception by UVR8. *Nature*, 484, 214–219.  
832 Yang Y., Liang T., Zhang L., Shao K., Gu X., Shang R., Shi N., Li X., Zhang P., Liu H. (2018).  
833 UVR8 interacts with WRKY36 to regulate HY5 transcription and hypocotyl elongation in  
834 Arabidopsis. *Nature Plants*, 4, 98–107.  
835 Yang Z., Liu B., Su J., Liao J., Lin C., Oka Y. (2017). Cryptochromes orchestrate transcription  
836 regulation of diverse blue light responses in plants. *Photochemistry and Photobiology*, 93, 112–127.  
837 Yang X., Montano S., Ren Z. (2015). How does photoreceptor UVR8 perceive a UV-B Signal?  
838 *Photochemistry and Photobiology*, 91, 993–1003.  
839 Yang H.-Q., Tang R.-H., Cashmore A.R. (2001). The signaling mechanism of Arabidopsis CRY1  
840 involves direct interaction with COP1. *The Plant Cell*, 13, 2573–2587.  
841 Yu X., Liu H., Klejnot J., Lin C. (2010). The Cryptochrome blue light receptors. *The Arabidopsis*  
842 *Book*, 8, e0135.  
843 Zhang R., Calixto C.P.G., Marquez Y., Venhuizen P., Tzioutziou N.A., Guo W., Spensley M.,  
844 Entizne J.C., Lewandowska D., Ten Have S., *et al.* (2017). A high quality Arabidopsis  
845 transcriptome for accurate transcript-level analysis of alternative splicing. *Nucleic Acids Research*,  
846 45, 5061–5073.  
847 Zuo Z., Liu H., Liu B., Liu X., Lin C. (2011). Blue light-dependent interaction of CRY2 with SPA1  
848 regulates COP1 activity and floral initiation in Arabidopsis. *Current Biology*, 21, 841–847.

849

850

851 **Figure legends:**

852

853 Figure 1. Transmittance of filters used in the outdoor experiment and the statistical contrasts  
854 between pairs of filter treatments used to assess the effects of different ranges of wavelengths in  
855 solar radiation.

856

857 Figure 2. Number of genes differentially expressed in response to 6 h of solar UV-B, UV-A and  
858 blue radiation in (a) *Ler*, (b) *uvr8-2*, (c) *cry1cry2*. The Venn diagrams show the unique genes for  
859 each waveband contrast and the overlap of genes between the waveband contrasts in each genotype.  
860 The stacked bar plots show total number of genes responding to the waveband contrasts in each  
861 genotype. The red bar refers to genes with increased expression and the blue bar refers to genes  
862 with decreased expression. See Figure 1 for the contrasts used to assess the effects of UV-B, UV-A  
863 and blue radiation.  $FC > 1.5$  and  $P_{\text{adjust}} < 0.05$ .

864

865 Figure 3. Number of genes differentially expressed in response to 6 h of solar UV-A<sub>sw</sub> and UV-A<sub>lw</sub>  
866 radiation in (a) *Ler*, (b) *uvr8-2*, (c) *cry1cry2*. The Venn diagrams show the unique genes for each  
867 waveband contrast and the overlap of genes between the waveband contrasts in each genotype. The  
868 stacked bar plots show total number of genes responding to the waveband contrasts in each  
869 genotype. The red bar refers to genes with increased expression and the blue bar refers to genes  
870 with decreased expression. See Figure 1 for the contrasts used to assess the effects of UV-A<sub>sw</sub> and  
871 UV-A<sub>lw</sub> radiation.  $FC > 1.5$  and  $P_{\text{adjust}} < 0.05$ .

872

873 Figure 4. Volcano plots showing DEGs with significantly increased expression (in red), DEGs with  
874 significantly decreased expression (in blue) and not significant (in grey) in response to 6 h of solar  
875 radiation of  $\lambda < 350$  nm (290–350 nm) and  $\lambda > 350$  nm (350–500 nm),  $\lambda$  refers to wavelength, n  
876 refers to number of differentially expressed genes. See Figure 1 for the contrasts used to assess the  
877 effects of  $\lambda < 350$  nm and  $\lambda > 350$  nm.  $FC > 1.5$  and  $P_{\text{adjust}} < 0.05$ .

878

879 Figure 5. Estimates of solar UV-B, UV-A<sub>sw</sub>, UV-A<sub>lw</sub> and blue photons absorbed by UVR8 and  
880 CRYs proteins throughout the day under the different filters used, expressed relative to their  
881 respective daily maximum. The red horizontal lines show when the plants were moved outdoors  
882 (0 h) or sampled (6 h and 12 h).

883

884 Figure 6. *In vitro* monomerization of purified UVR8 protein from *Nicotiana benthamiana* exposed  
885 to UV radiation from a tunable laser. The time of exposure and photon doses at different  
886 wavelengths were: 10 min and 1.9  $\mu\text{mol}$  at 300 nm, 30 min and 5.1  $\mu\text{mol}$  at 320 nm, 30 min and  
887 4.5  $\mu\text{mol}$  at 325 nm, 30 min and 3.8  $\mu\text{mol}$  at 330 nm, 30 min and 3.4  $\mu\text{mol}$  at 335 nm, 60 min and  
888 6.2  $\mu\text{mol}$  at 340 nm, 60 min and 5.8  $\mu\text{mol}$  at 345 nm, 60 min and 5.3  $\mu\text{mol}$  at 350 nm. The picture  
889 shows the Coomassie stained gel. UVR8D refers to the dimer and UVR8M the monomer. The  
890 figure is representative of three repeats.

891

892 Figure 7. The *in silico* enrichment of DNA-binding motifs in our RNA-seq data showing 187  
893 putative regulatory transcription factors (TFs). See Figure S8 for the position weight matrix of the  
894 enriched motifs. The enrichments were done in 1000 base pairs upstream of the coding regions of  
895 the DEGs from each waveband contrast and genotype combination. TFs with  $P_{\text{adjust}} < 0.01$  in at  
896 least one contrast and genotype combination were included in the figure. Of the 187 enriched TFs,  
897 those which were also differentially expressed in our experiment are presented in bold letters and  
898 shown as "DE" in the figure.

899

900 Figure 8. Transcript abundance ( $\log_{10}\text{FC}$ ) of four genes *CHI*, *CHS*, *RUP2* and *SPS1* after 6 h and  
901 12 h of treatment outdoors. These genes showed a significant triple interaction (genotype  $\times$   
902 radiation treatment  $\times$  exposure time). Mean  $\pm 1\text{SE}$  from four biological replicates. The horizontal  
903 bars show  $P_{\text{adjust}}$  values for pair-wise comparisons between treatments within each genotype.  $P_{\text{adjust}}$   
904 values for pair-wise contrasts are shown only in those panels where the overall effect of filter  
905 treatment within a genotype and time point was significant (see Table S2).

Filter cut-off designations: — >290    ····· >315    - - - >350    - - - >400    ····· >500

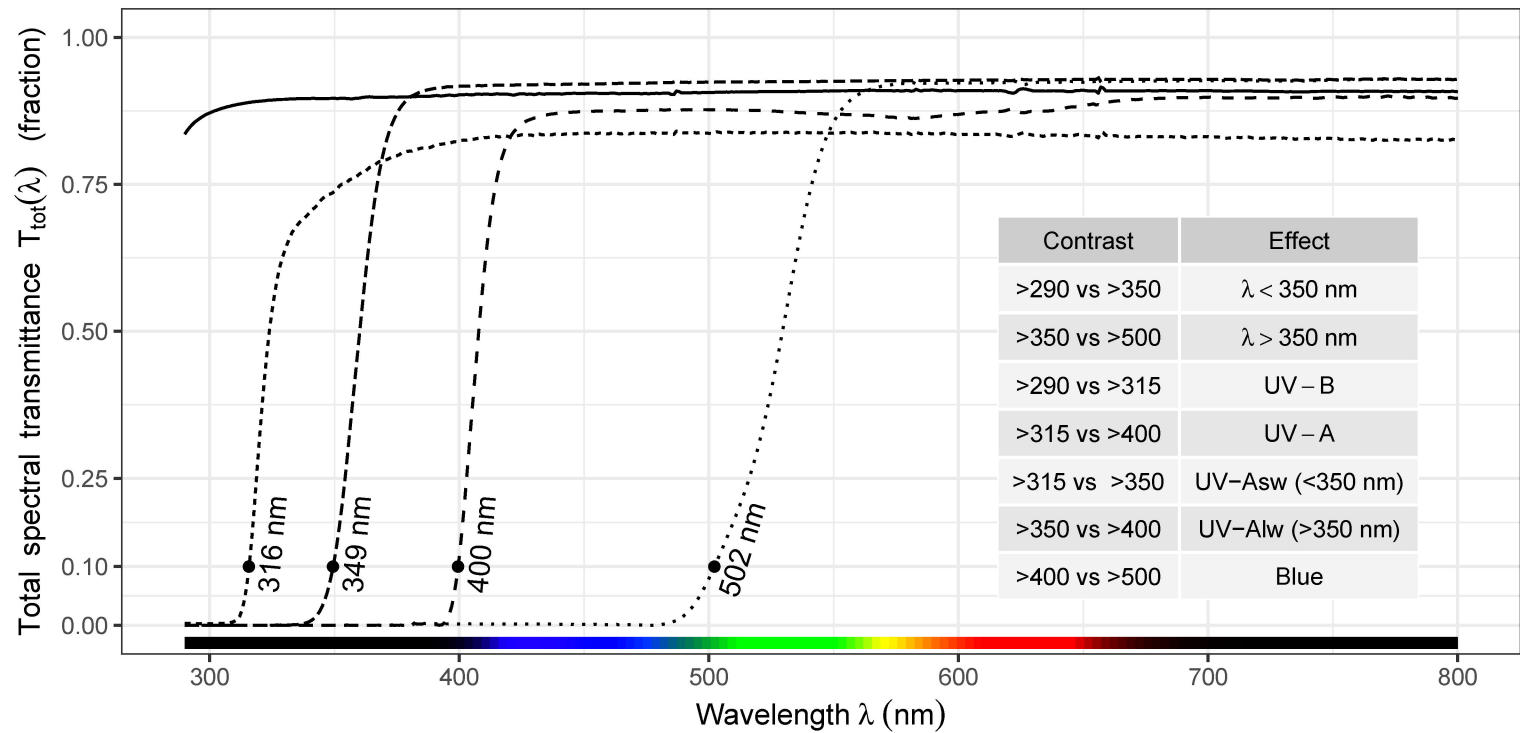

**(a)** *Ler*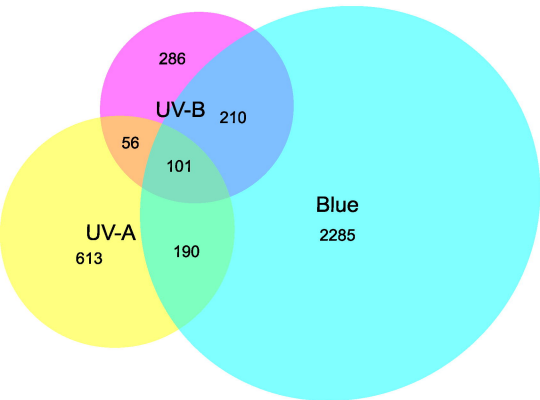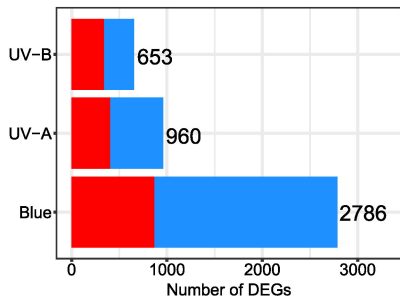**(b)** *uvr8-2*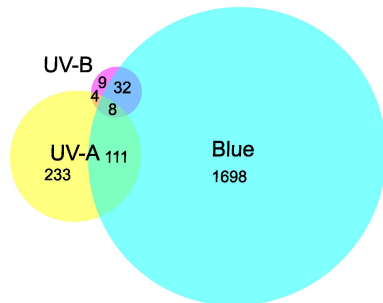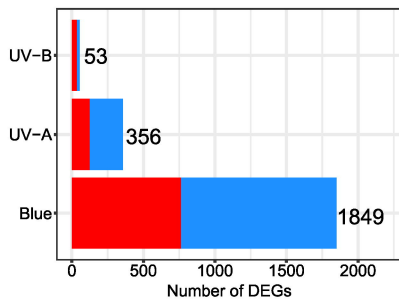**(c)** *cry1cry2*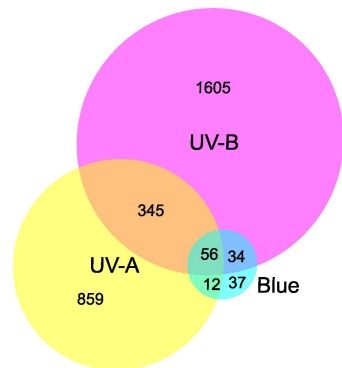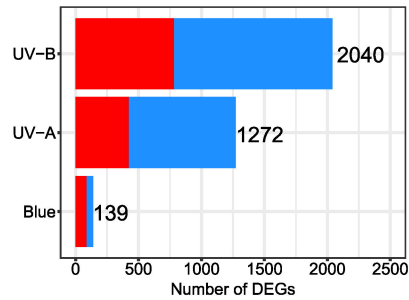

**(a)** Ler

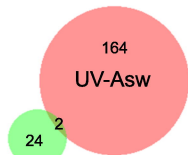

UV-Alw

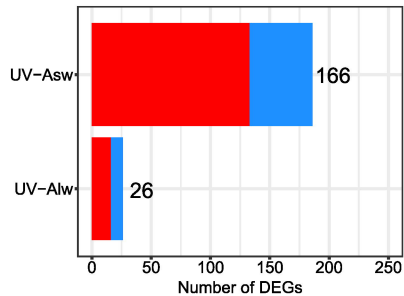

**(b)** *uvr8-2*

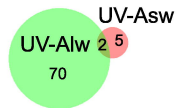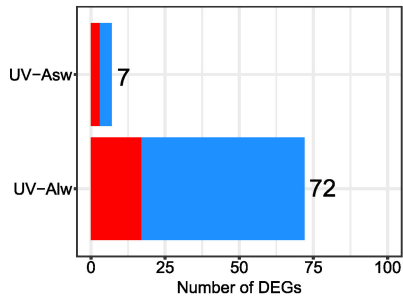

**(c)** *cry1cry2*

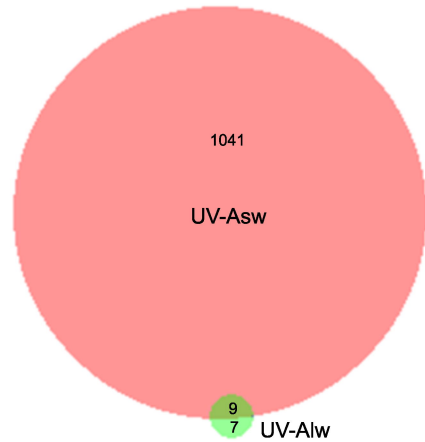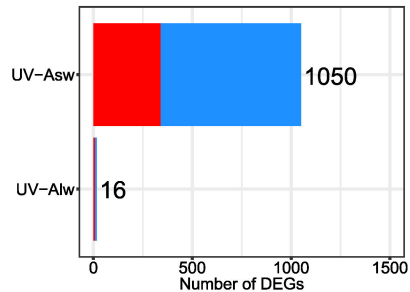

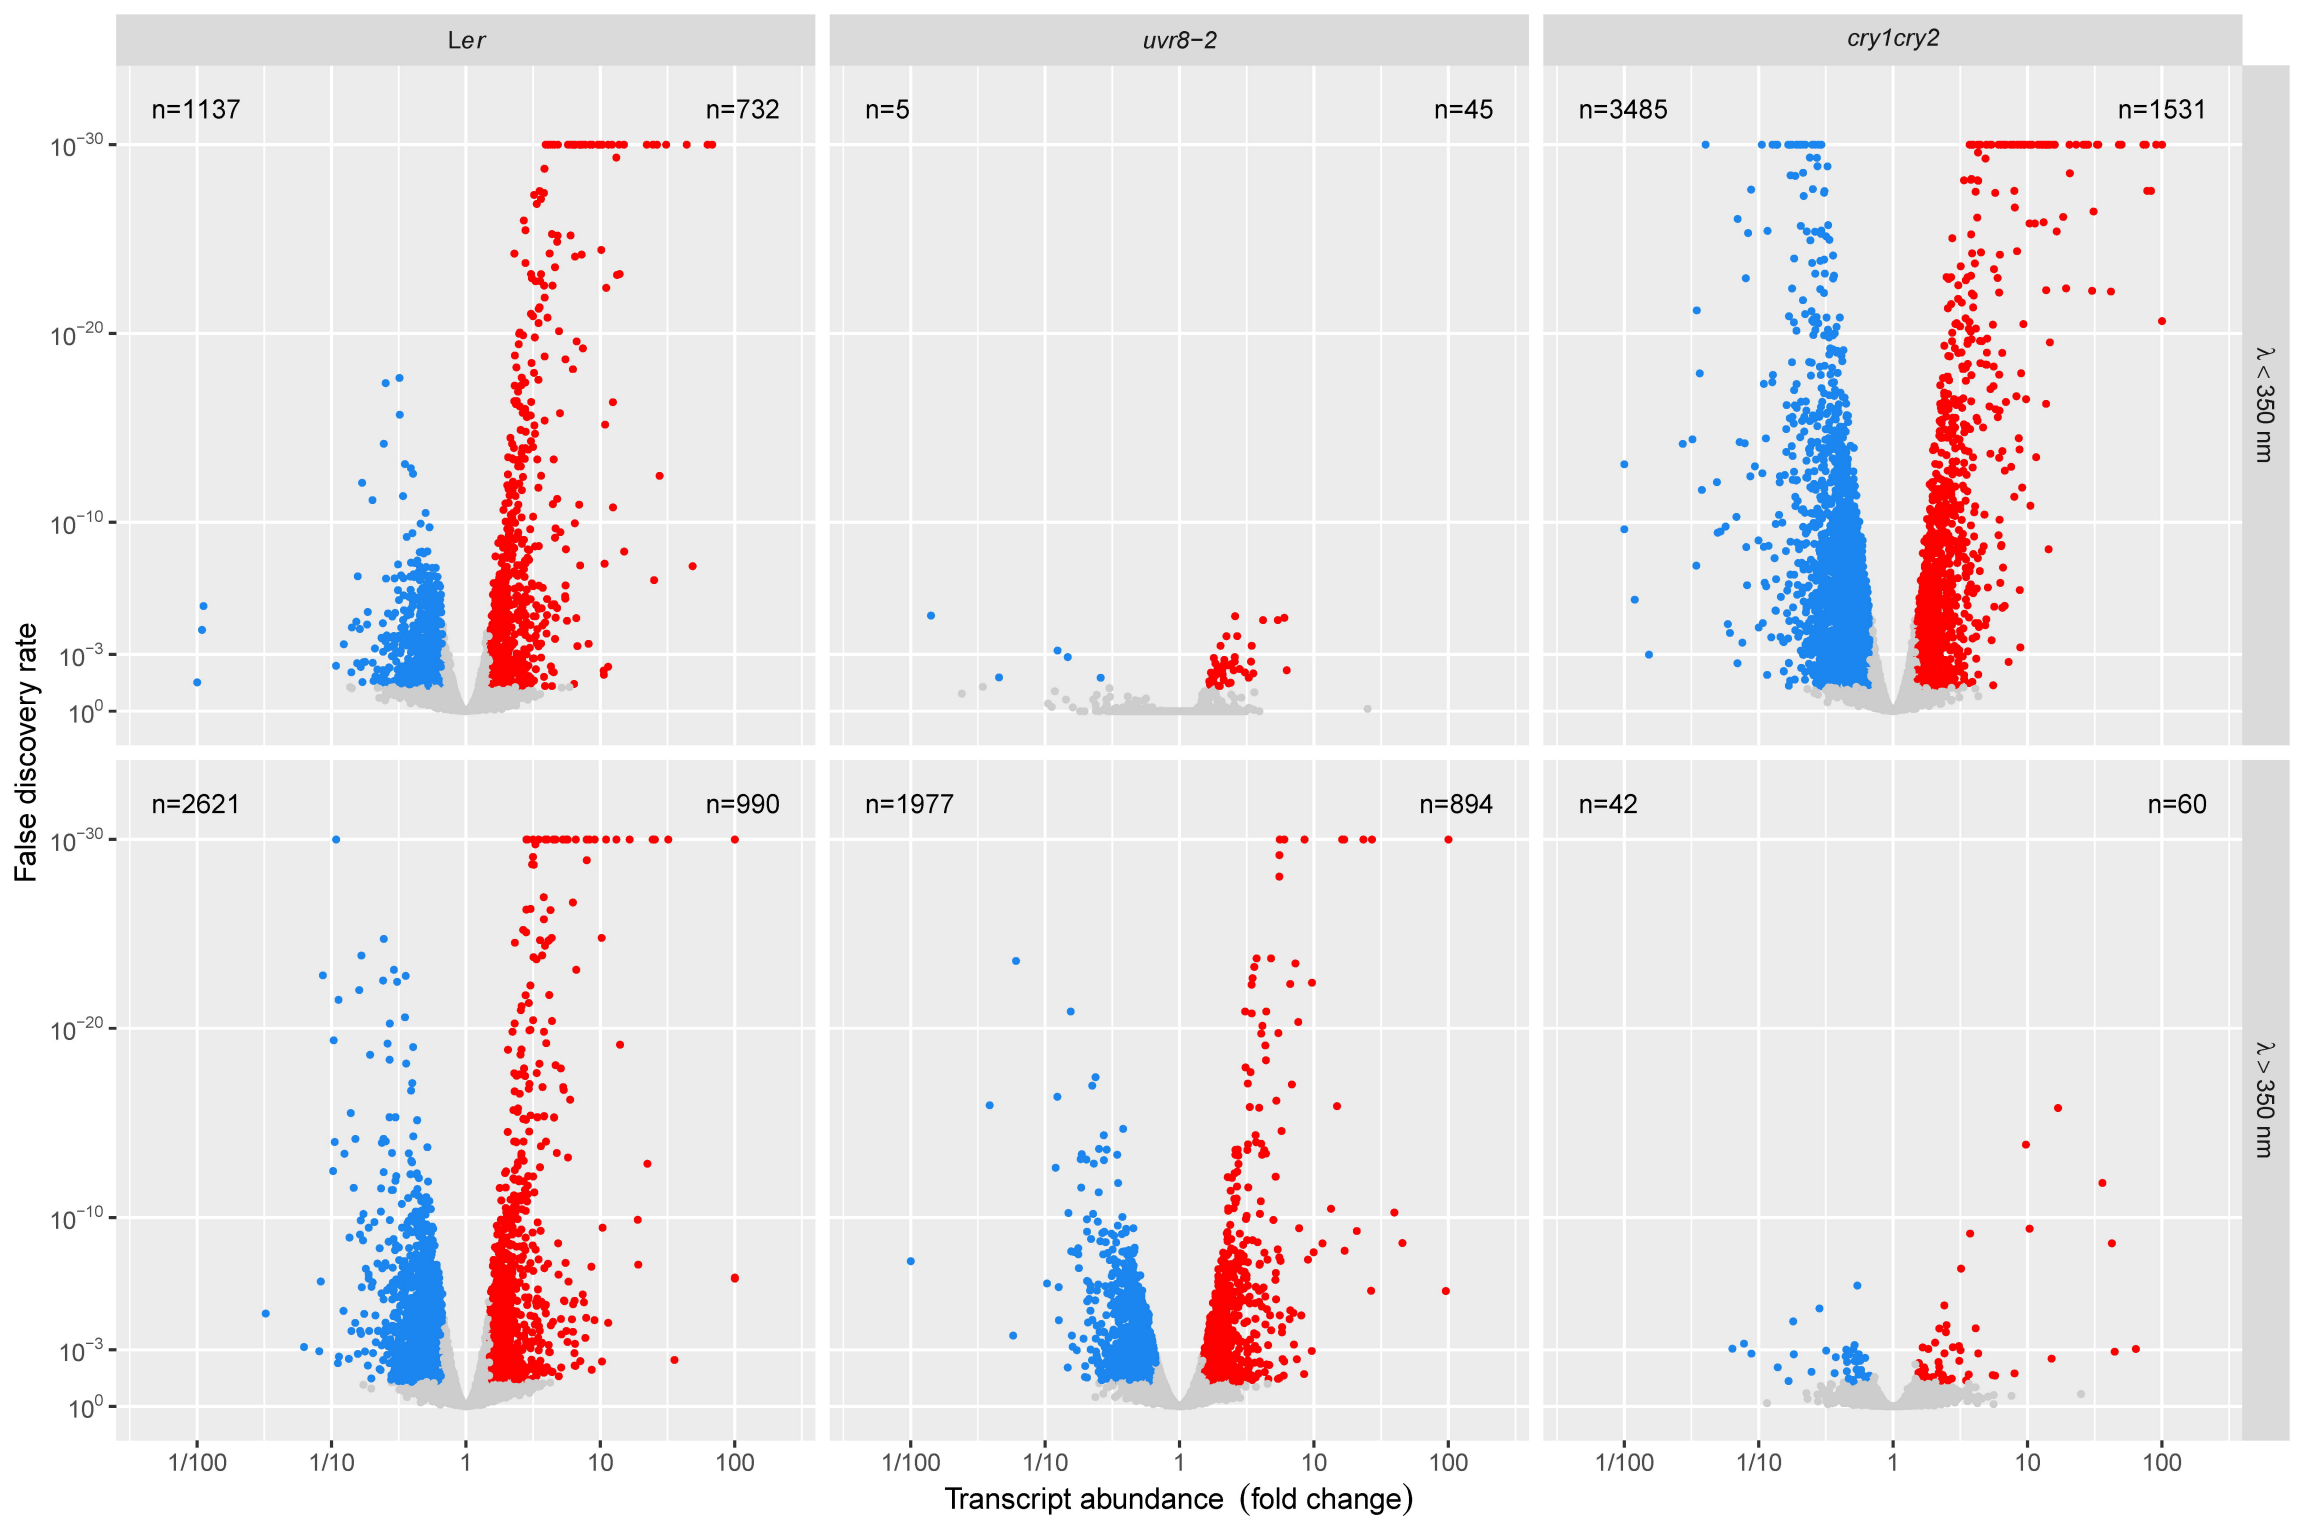



Filter cut-off wavelength (nm) — >290 - - - >315 - - - >350 - - - >400 ····· >500

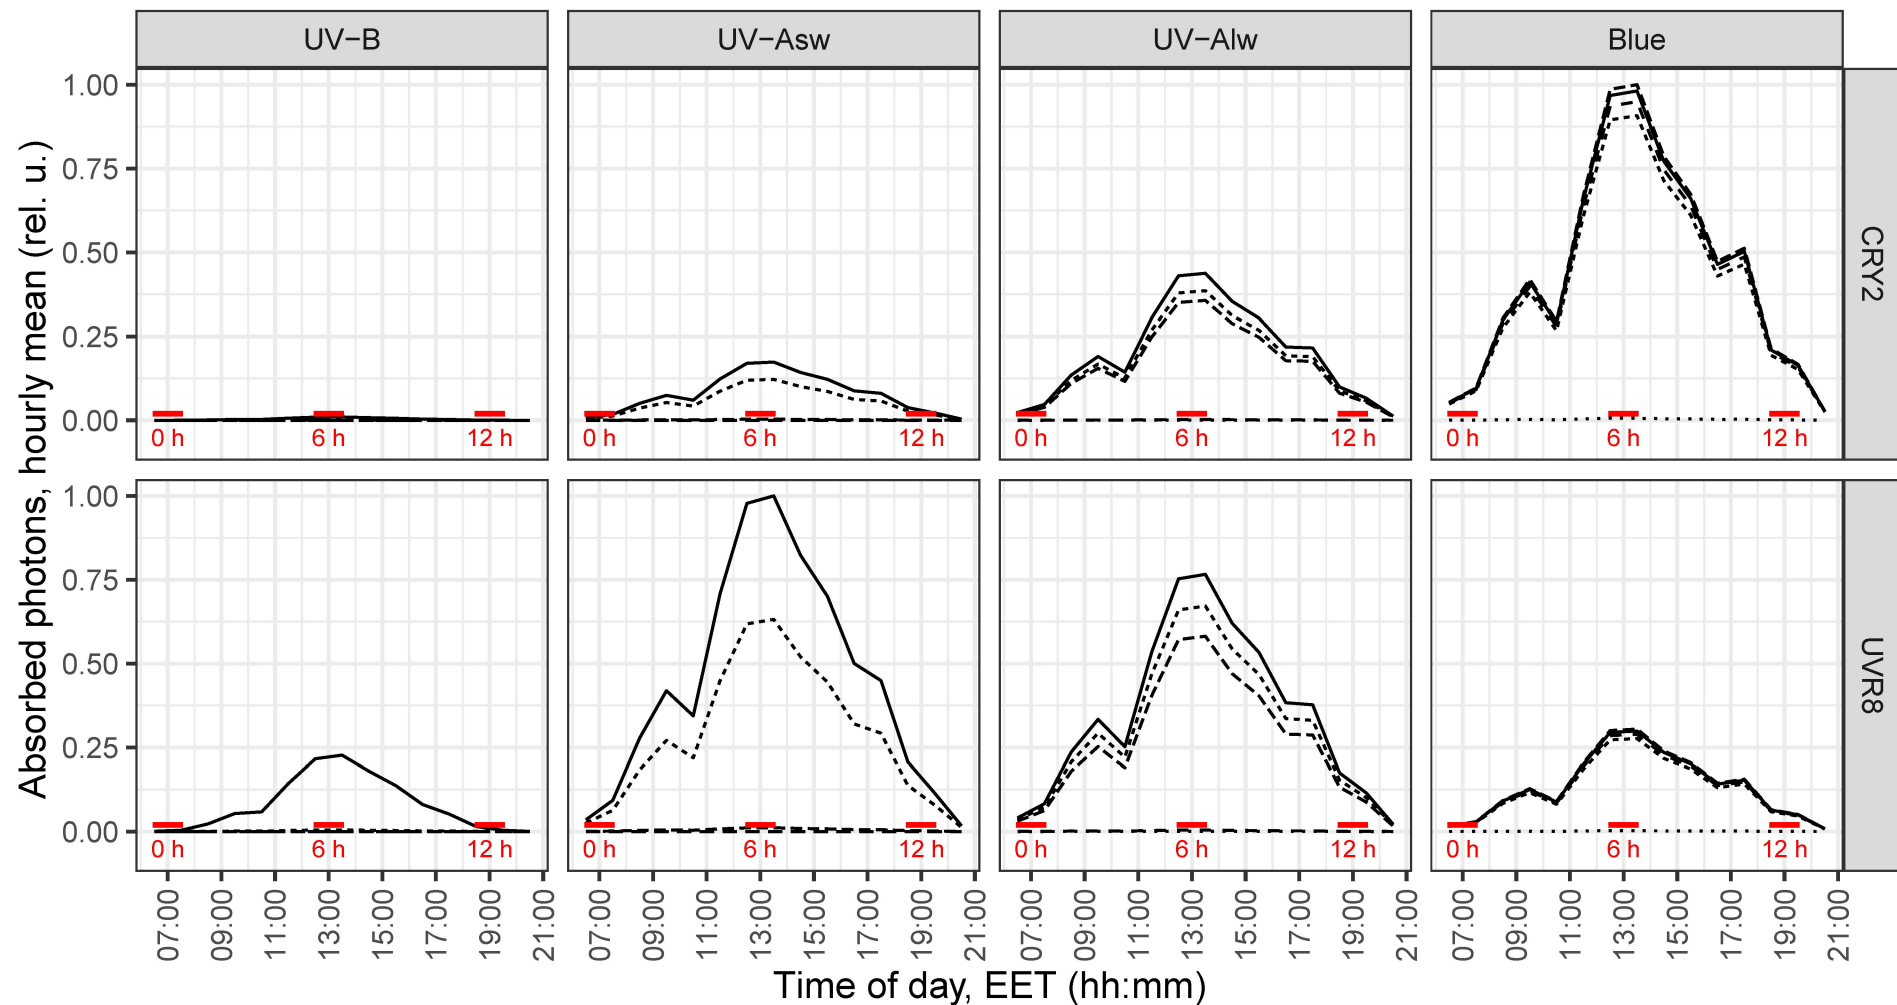



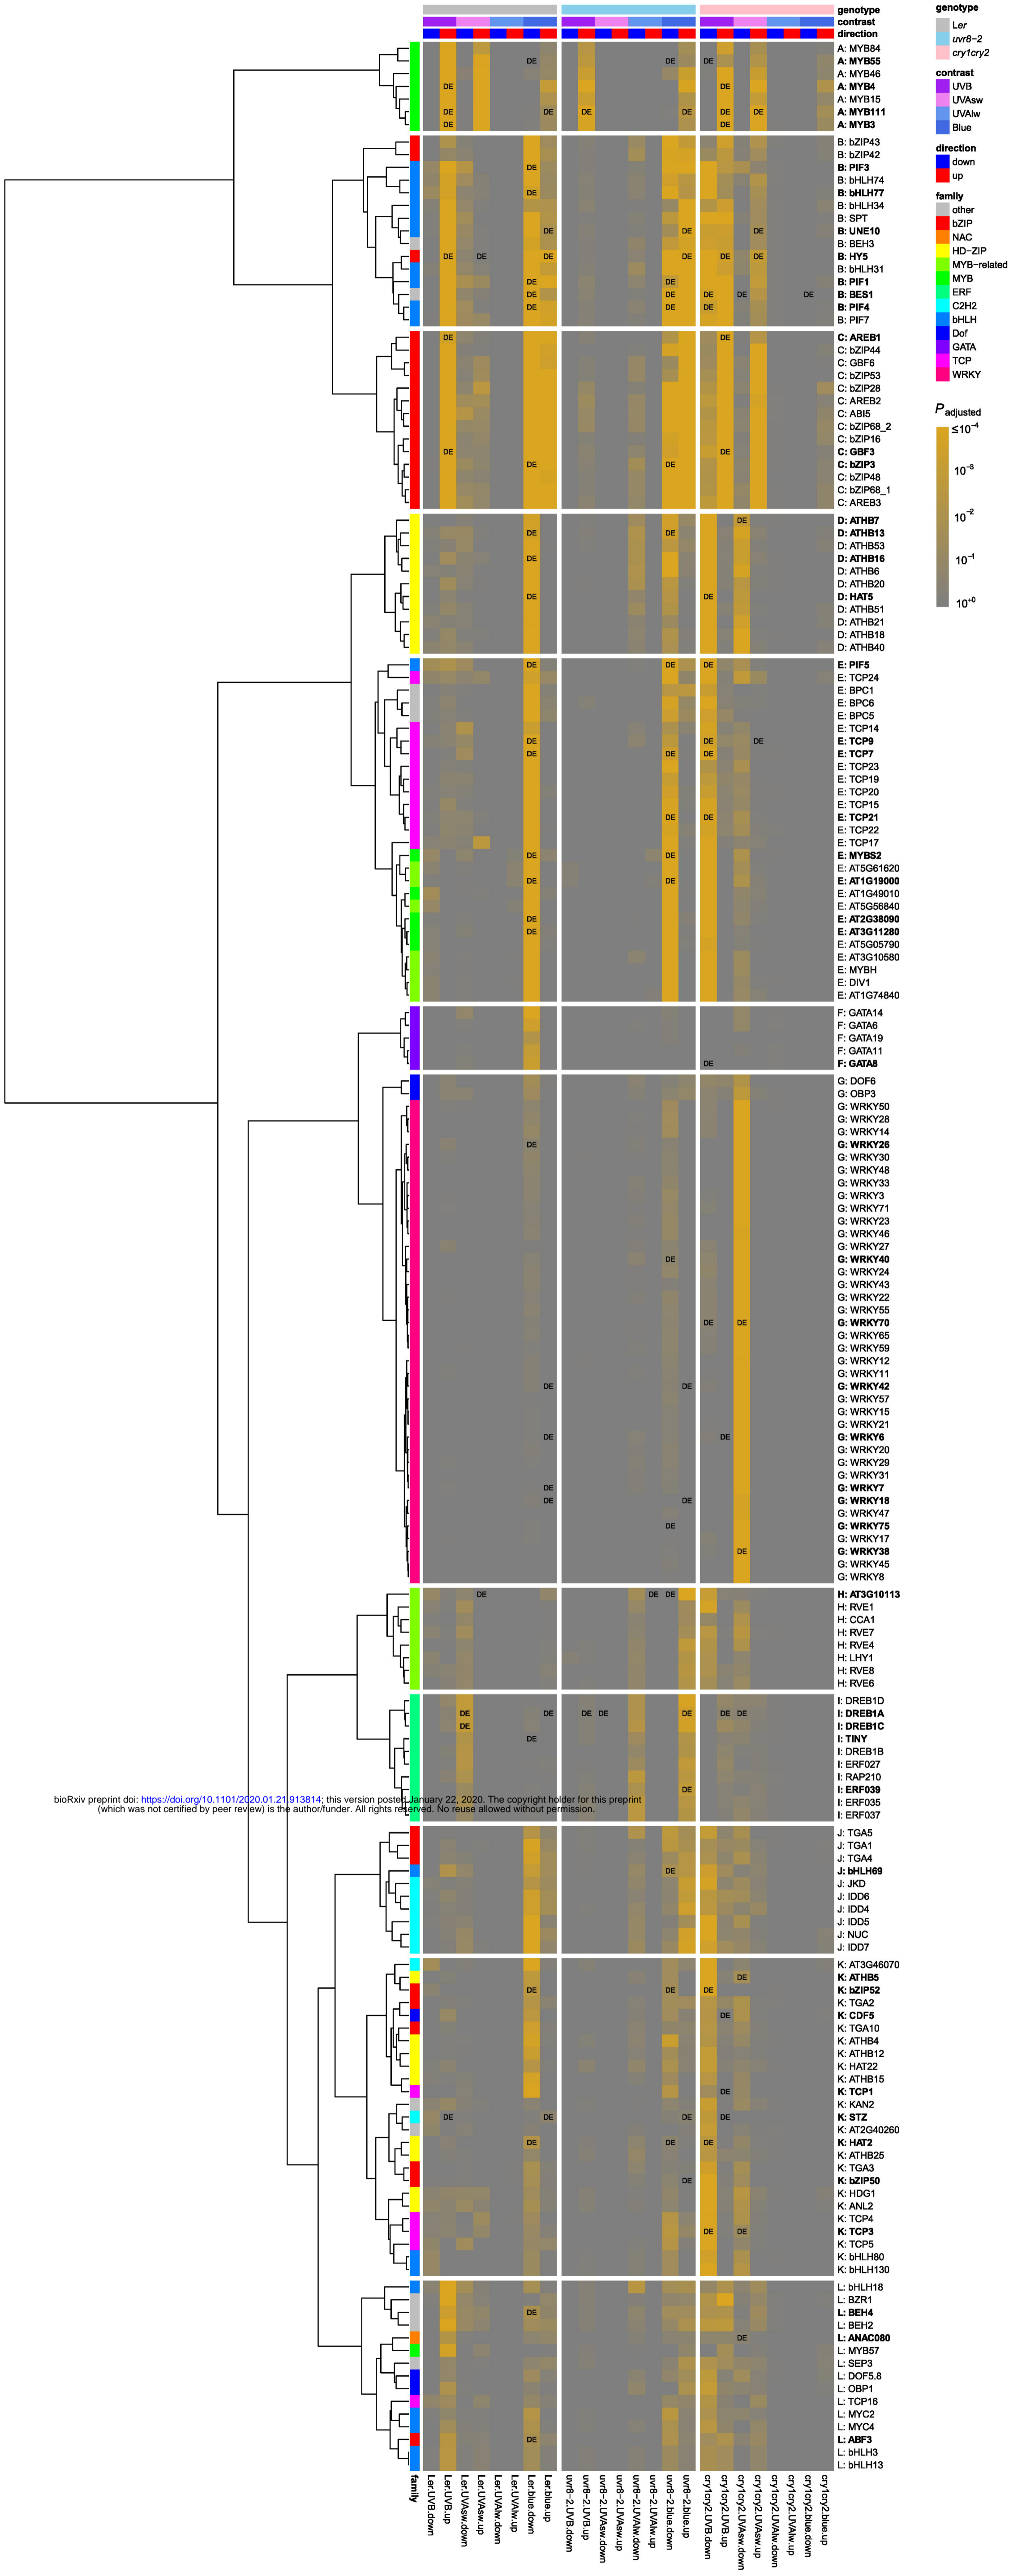

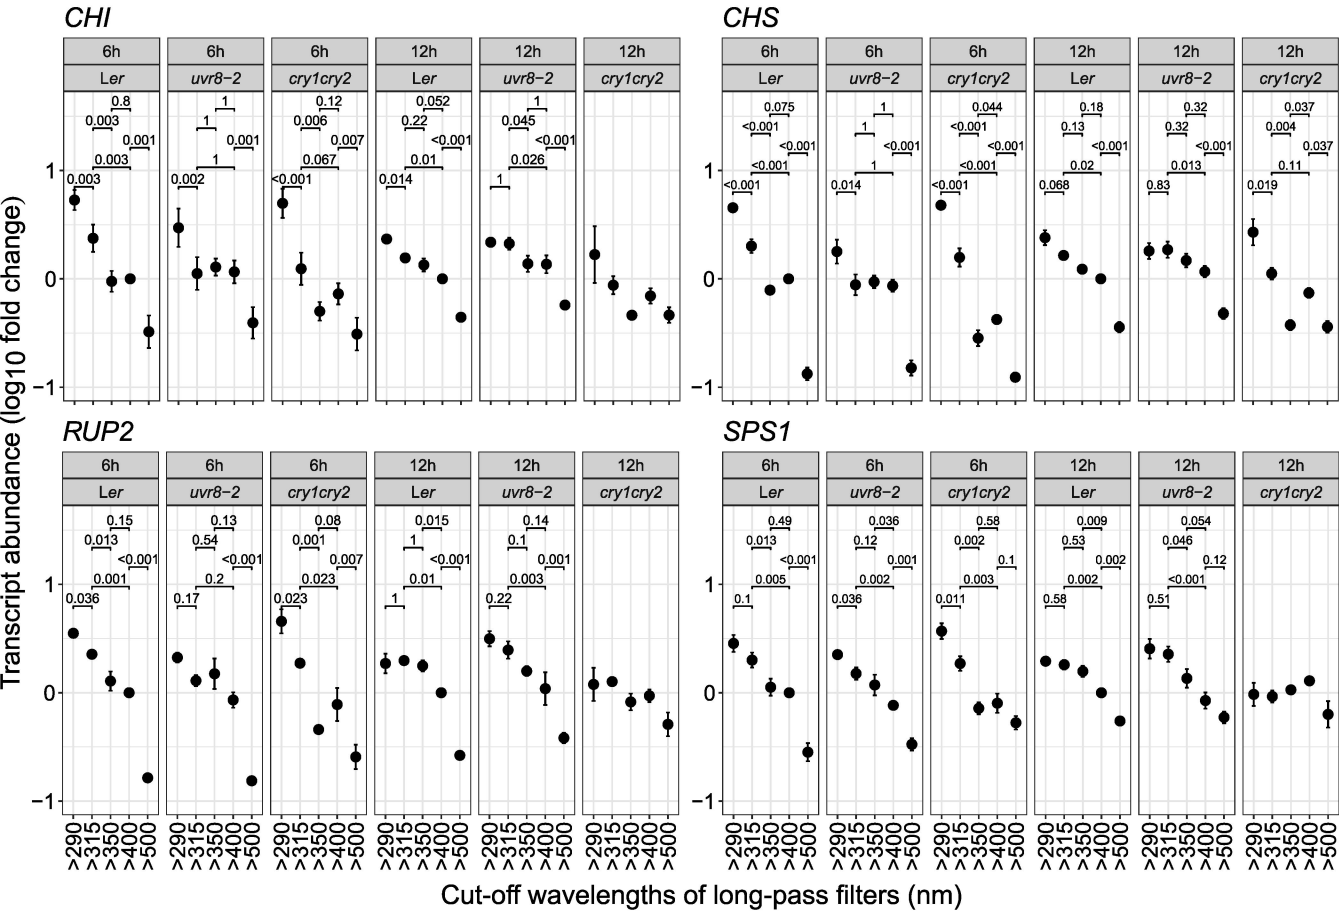

Source: http://biorxiv.org/content/10.1101/2020.01.21.913814v1.full.pdf
